## RESEARCH ARTICLE

# Dendrites with specialized glial attachments develop by retrograde extension using SAX-7 and GRDN-1

Elizabeth R. Cebul\*, Ian G. McLachlan\* and Maxwell G. Heiman<sup>‡</sup>

## ABSTRACT

Dendrites develop elaborate morphologies in concert with surrounding glia, but the molecules that coordinate dendrite and glial morphogenesis are mostly unknown. *C. elegans* offers a powerful model for identifying such factors. Previous work in this system examined dendrites and glia that develop within epithelia, similar to mammalian sense organs. Here, we focus on the neurons BAG and URX, which are not part of an epithelium but instead form membranous attachments to a single glial cell at the nose, reminiscent of dendrite-glia contacts in the mammalian brain. We show that these dendrites develop by retrograde extension, in which the nascent dendrite endings anchor to the presumptive nose and then extend by stretching during embryo elongation. Using forward genetic screens, we find that dendrite development requires the adhesion protein SAX-7/L1CAM and the cytoplasmic protein GRDN-1/CCDC88C to anchor dendrite endings at the nose. SAX-7 acts in neurons and glia, while GRDN-1 acts in glia to non-autonomously promote dendrite extension. Thus, this work shows how glial factors can help to shape dendrites, and identifies a novel molecular mechanism for dendrite growth by retrograde extension.

**KEY WORDS:** Dendrites, Glia, *C. elegans*, Neurodevelopment, Retrograde extension

## INTRODUCTION

Neurons weave their dendritic arbors within a fabric of axons and glia. How dendrites and axons wire together has been intensely studied, but less attention has been given to developmental interactions between dendrites and glia. Nonetheless, the precisely coordinated morphologies of dendrites and glia are striking, and play a key role in controlling neural activity (Lamkin and Heiman, 2017). For example, in the cerebellum, Bergmann glia appear to scaffold the growth of Purkinje dendrites (Lordkipanidze and Dunaevsky, 2005) and guide their innervation by specific axon types (Ango et al., 2008). At the fine scale, Bergmann glia wrap individual dendritic spines to control synapse number (Lippman Bell et al., 2010). Similarly, in the hippocampus, dendrites receive Ephrin signals from apposed glial processes that modulate dendritic spine morphology and can also alter synaptic strength (Murai et al., 2003; Nishida and Okabe, 2007; Carmona et al., 2009; Bernardinelli et al., 2014; Perez-Alvarez et al., 2014). These

examples have provided a glimpse into the diversity of dendrite-glia contacts in the brain. However, broader exploration of dendrite-glia contacts and the molecular mechanisms that control them has been limited by the difficulty of studying single defined contacts *in vivo* and performing forward genetic screens in mammalian systems. To overcome these challenges, we have turned to the simple nervous system of *C. elegans* as a model for studying specialized dendrite-glia contacts.

*C. elegans* offers several advantages. Each of its cells can be uniquely identified and has a remarkably stereotyped shape and set of cell-cell contacts; neuron- and glia-specific promoters allow the targeted expression of transgenes in single cells to visualize and manipulate specific neuron-glia contacts in intact living animals; and its powerful genetics permit unbiased screens to identify factors that control neuron-glia interactions. Additionally, *C. elegans* glia share a number of important features with mammalian glia (Mizeracka and Heiman, 2015). This system thus offers a powerful genetic model for dissecting dendrite-glia contacts. Here, we have turned our attention to a previously overlooked class of dendrite-glia contacts that have elaborate, tightly apposed membranous structures which are reminiscent of the highly coordinated membranous contacts found between astrocytes and dendritic spines at mammalian synapses.

Using super-resolution microscopy, we find that the dendrites of two neuron types, URX and BAG, form specialized attachments with a single glial partner. Using forward genetics, we identify two conserved molecules, SAX-7 and GRDN-1, that are required for the development of these dendrites. SAX-7 is a homolog of the mammalian neuron-glia adhesion molecule L1CAM, and GRDN-1 is a homolog of proteins involved in cell polarity and cytoskeleton organization. Each of these homologs is expressed in the mammalian brain and causes developmental brain disorders when disrupted (Jouet et al., 1994; Vits et al., 1994; Ekici et al., 2010). Using embryonic time-course imaging, we find that URX and BAG dendrites develop by retrograde extension, a type of outgrowth in which the dendrites anchor to their targets and then extend by stretching. SAX-7 and GRDN-1 help to anchor dendrite endings at the nose during embryo elongation. In mutants, dendrites detach from the nose during development and fail to fully extend. SAX-7 acts both in neurons and glia, while GRDN-1 acts in glia to non-autonomously promote URX and BAG dendrite extension. This suggests that dendrite anchoring might occur through early attachments to glia.

Retrograde extension has previously been described in the *C. elegans* amphid, which develops as a narrow epithelial tube made up of neurons and glia (Heiman and Shaham, 2009; Fan et al., 2019; Low et al., 2019). In this example, dendrite anchoring requires apical extracellular matrix that lines the lumen of the developing amphid (Heiman and Shaham, 2009; Low et al., 2019). Interestingly, axons of the zebrafish olfactory system also form by retrograde extension, attaching near the surface of the brain while their cell bodies move away (Breau et al., 2017), suggesting that this mode of growth may be shared across species. The results described here

Department of Genetics, Blavatnik Institute, Harvard Medical School and Boston Children's Hospital, Boston, MA 02115, USA.

\*These authors contributed equally to this work

<sup>‡</sup>Author for correspondence (heiman@genetics.med.harvard.edu)

© E.R.C., 0000-0001-5218-265X; I.G.M., 0000-0002-1897-7288; M.G.H., 0000-0002-2557-6490

Received 14 May 2019; Accepted 7 January 2020

define a novel molecular mechanism of retrograde extension used by non-epithelial neurons, and suggest a surprising means by which dendrite morphogenesis can be shaped by interactions with glia.

## RESULTS

### URX and BAG dendrite endings form specialized contacts with a single glial partner

URX and BAG are bilaterally symmetric pairs of sensory neurons in the head that mediate behavioral responses to oxygen and carbon dioxide (Cheung et al., 2004; Gray et al., 2004; Hallem and Sternberg, 2008; Zimmer et al., 2009; Bretscher et al., 2011; Laurent et al., 2015). Each of these neurons extends a single unbranched dendrite to the nose, a distance of ~100-150  $\mu\text{m}$  in adults (Fig. 1A,C) (Ward et al., 1975). The dendrites reside in distinct nerve bundles (URX, dorsal bundle; BAG, lateral bundle), where they fasciculate closely with other sensory dendrites and several classes of glial cells (Ward et al., 1975). This study focuses on URX and BAG dendrite interactions with one class of glia: the inner labial socket (ILso) glia.

At the nose, the URX and BAG dendrites terminate in specialized sensory structures containing guanylate cyclases that detect molecular oxygen and carbon dioxide (Smith et al., 2013; Gross et al., 2014). Classical electron microscopy (EM) reconstructions showed that the BAG dendrite terminates in a sensory cilium with a membranous bag-shaped elaboration (hence ‘BAG’) that wraps around a thumb-like protrusion from the lateral ILso glial cell (Fig. 1A) (Ward et al., 1975; Doroquez et al., 2014). We became

interested in this structure because the elaborate wrapping morphology reminded us of glia-dendrite contacts in the mammalian brain. For example, in the cerebellum, Bergmann glia extend elaborate membranous processes that precisely wrap around dendritic spines, structures that are analogous to the BAG sensory cilium (Špaček, 1985; Xu-Friedman et al., 2001; Lippman et al., 2008). Although here the dendrite ending wraps the glial cell, we reasoned that similar mechanisms might underlie coordinated morphogenesis of the dendritic and glial membranes in both cases.

To investigate this structure in intact living animals, we developed tools and approaches for super-resolution imaging of BAG and ILso glia. We expressed combinations of soluble, membrane-associated and ciliary fluorescent markers under the control of cell-specific promoters (see Materials and Methods), and used 3D structured illumination microscopy to visualize the cells. We could discern a subtle constriction at the BAG dendrite ending, consistent with the base of the cilium (Fig. 1B, caret), followed by a bag-shaped membranous elaboration ~1-2  $\mu\text{m}$  in diameter that perfectly wraps a thumb-like protrusion from the lateral ILso glial cell (Fig. 1B; additional examples in Fig. S1A-D). Cross-sectional views confirmed that the BAG cilium wraps around the ILso membrane in this region (Fig. 1Bi). We observed variation in the morphology of this structure across individuals, but the glial cell and the dendritic elaboration always formed precisely interlocking shapes (Fig. S1A-D). In cross-sectional views, we could discern the pore at the ILso glial ending through which dendrites of

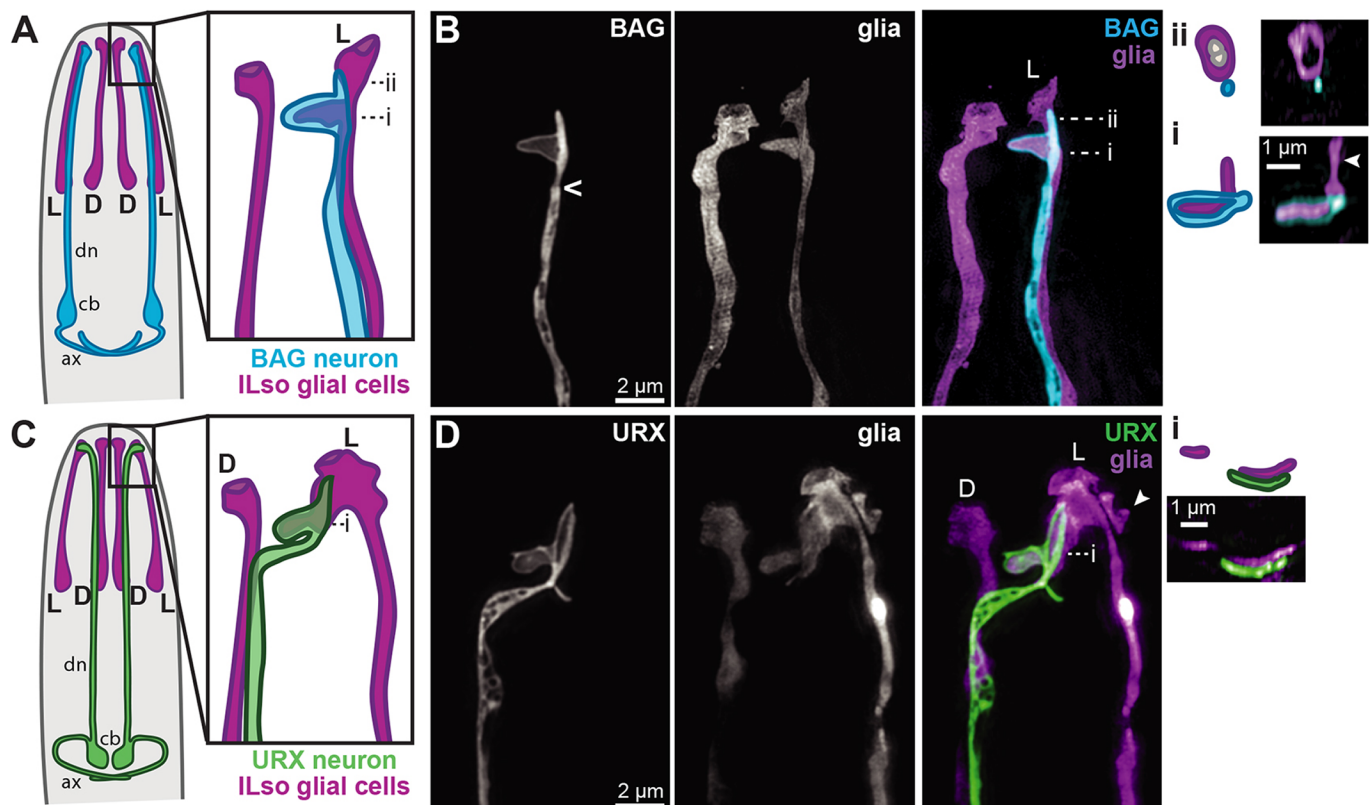

**Fig. 1. BAG and URX dendrites form specialized contacts with a single glial cell.** (A,C) Schematics of a *C. elegans* head (nose is at the top) showing BAG (A, blue) or URX (C, green) relative to the inner labial socket glia (ILso, purple). Dorsal (D) and lateral (L) pairs of glia are indicated; an additional ventral pair is not shown. cb, neuronal cell bodies; dn, dendrites; ax, axons. (B,D) Single-wavelength and merged super-resolution images of BAG (blue, *flp-17pro*) or URX (green, *flp-8pro*) and ILso glia (purple, *grl-18pro*) acquired with structured illumination microscopy. Caret indicates the base of the cilium. Bi and Bii show cross-sectional views and schematics of the indicated image planes. (Bi) BAG wraps around a thumb-like protrusion of the glial cell. A second protrusion is visible in this view (arrowhead). (Bii) The ILso glial cell forms a pore through which two unlabeled neurons access the environment; BAG does not enter this pore. (D) The URX dendrite ‘jumps’ from the dorsal to lateral ILso and forms a sheet-like contact with a protrusion from this glial cell (cross-section in Di). A second protrusion from the glial cell, likely the BAG-associated thumb, is partly visible (arrowhead).

mechanosensory (IL1) and chemosensory (IL2) neurons protrude to the outside of the animal (Ward et al., 1975); in contrast, the BAG dendrite does not enter this pore and is not directly exposed to the external environment (Fig. 1Bii).

Next, we sought to compare this structure with that of URX. The URX dendrite is not thought to be ciliated, and previous imaging suggested it terminates in a ‘large bulb’ where signaling molecules are localized (Ward et al., 1975; Gross et al., 2014; McLachlan et al., 2018). However, super-resolution imaging of the URX dendrite ending revealed a more complex structure (Fig. 1D). As expected, we found that the URX dendrite fasciculates along its length with the dorsal nerve bundle. But, surprisingly, it exits this bundle at the nose and ‘jumps’ over to the lateral nerve bundle (visible in ~90% of animals,  $n > 40$ ) (Fig. 1D; additional examples in Fig. S1E-H). This contact has not been described previously and suggests that URX can discriminate between the dorsal and lateral ILso glial endings. The URX dendrite does not enter the pore made by the lateral ILso glial cell, but instead forms a membranous sheet-like elaboration that covers another protrusion from this cell (but does not fully wrap it, Fig. 1Di). Thus, the lateral ILso glial cell extends two protrusions, one wrapped by the BAG dendrite ending and the other covered by the URX dendrite ending. The ‘two-armed’ morphology of the lateral ILso glial cell is especially apparent in some views (see Fig. S1A,B,D,H). Remarkably, a similar arrangement is observed in *Pristionchus pacificus*, a species that diverged from *C. elegans* about 100 million years ago (Hong et al., 2019). An intriguing possibility is that this glial cell provides some kind of specialized support for carbon dioxide and oxygen sensation.

Here, we focus on the broad question of how the URX and BAG dendrites develop. Owing to their intimate association with the ILso glial cell, we reasoned that their mechanism of development might reveal an interesting role for glia.

### URX and BAG dendrites do not require genes used for amphid dendrite development

We first asked whether URX and BAG extend their dendrites using the molecular mechanism previously described for neurons in the amphid, the largest *C. elegans* sense organ (Heiman and Shaham, 2009). Similar to URX and BAG, each of the 12 amphid neurons has an unbranched dendrite that terminates at the nose, where they display sensory cilia and associate with specific glia (the amphid sheath and socket, Fig. 2A) (Ward et al., 1975). However, unlike URX and BAG, the amphid dendrites form epithelial junctions with glia (Low et al., 2019) and navigate through pores in the glia to directly access the external environment (Fig. 2B). This arrangement resembles the architecture of some mammalian sense organs, such as the olfactory epithelium.

Amphid dendrites develop using *DYF-7* and *DEX-1*, which resemble apical extracellular matrix (ECM) proteins that are found in many epithelia but are not widely expressed in the brain (Heiman and Shaham, 2009). During development, *DYF-7* and *DEX-1* anchor the tips of the developing amphid dendrites at the embryonic nose as the cell bodies migrate away, stretching the dendrites out behind them in a phenomenon called retrograde extension (Heiman and Shaham, 2009). In *dyf-7* or *dex-1* mutants, the dendrite endings detach and the dendrites fail to extend (Heiman and Shaham, 2009). Several other classes of head sensory neurons (CEP, IL and OL) also have dendrite endings that protrude through glial pores to the environment, and all of them also require *DYF-7* (Low et al., 2019).

As noted above, URX and BAG dendrites do not protrude through a glial pore and are not directly exposed to the environment.

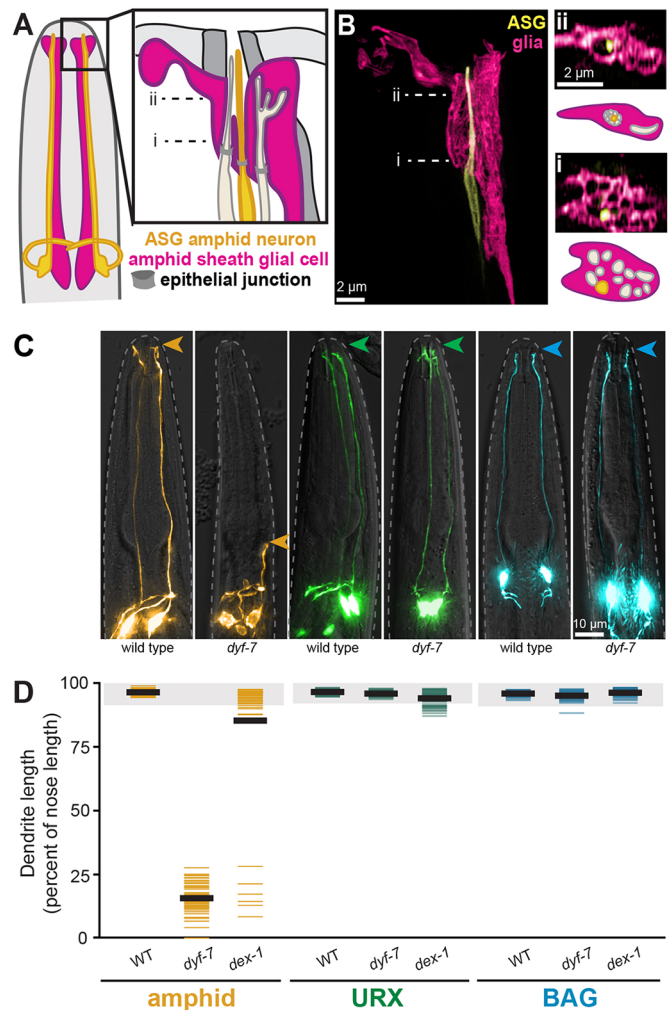

**Fig. 2. URX and BAG dendrites develop by a mechanism distinct from the amphid.** (A) Schematic of a *C. elegans* head showing representative amphid neurons (ASG neuron, yellow; other neurons, tan) and the amphid sheath glial cell (pink). Most amphid dendrites enter individual channels in the glial cell that converge to a central pore; some terminate in pockets within the sheath. (B) Single-wavelength and merged super-resolution images of ASG (yellow, *ops-1pro*) and the amphid sheath (pink, *F16F9.3pro*). i and ii show cross-sectional views and schematics of the indicated image planes. (i) Twelve individual channels in the sheath, one for each amphid dendrite, were previously seen only by EM. ASG can be seen inside one of these channels. (ii) The channels converge distally to a central pore with ASG inside it. (C) Wild-type and *dyf-7* animals expressing markers for an amphid neuron (AWC, yellow, *odr-1pro*), URX (green, *flp-8pro*) or BAG (blue, *flp-17pro*). Arrowheads indicate dendrite endings. (D) Dendrite lengths in wild-type, *dyf-7* and *dex-1* animals, expressed as a percentage of the distance from cell body to nose. Colored bars represent individual dendrites ( $n \geq 50$  per genotype); black bars represent population averages; shaded region represents wild-type mean  $\pm 5$  s.d. for each neuron type, which we define as ‘full length’. All amphid dendrites are affected by *dyf-7* and *dex-1* (Heiman and Shaham, 2009).

Consistent with these anatomical differences, we found that URX and BAG dendrite development is grossly unaffected in *dyf-7* and *dex-1* mutants (Fig. 2C,D). Some *dex-1* URX dendrites exhibit subtle length defects, possibly owing to secondary effects on the IL sense organs. URX and BAG dendrites thus likely develop using different molecular mechanisms from previously studied neurons. This prompted us to try to identify factors required for URX and BAG dendrite development, and to learn whether they more closely resemble factors used in the mammalian brain.



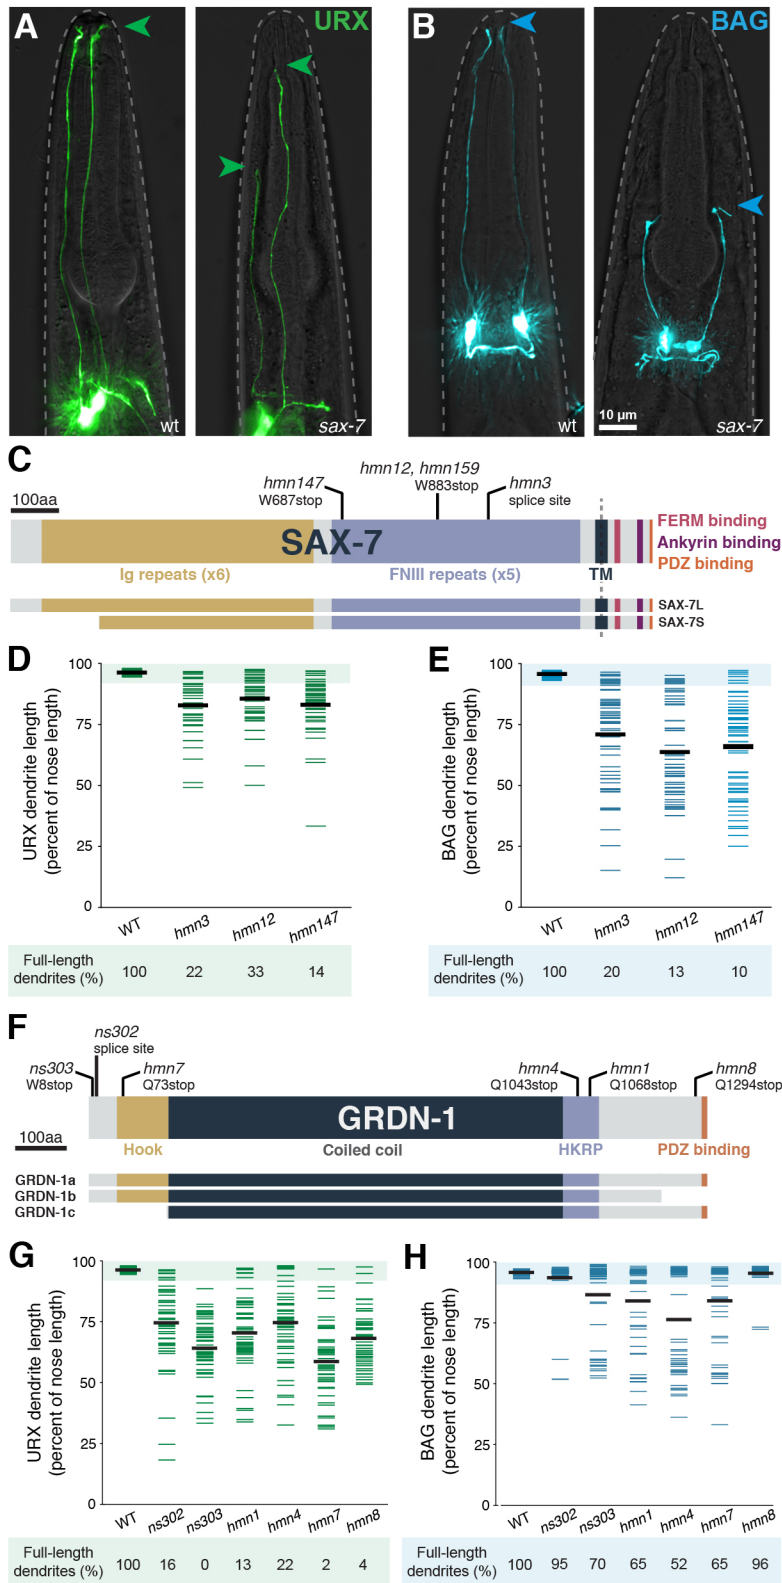

**Fig. 3. URX and BAG dendrite morphogenesis requires SAX-7 and GRDN-1.** (A,B) URX (A, *flp-8pro*) and BAG (B, *flp-17pro*) neurons in wild-type (left) and *sax-7* (right) animals. Arrowheads indicate dendrite endings. (C,F) Schematics of (C) SAX-7 and (F) GRDN-1, indicating alleles and conserved domains. Ig, immunoglobulin; FNIII, fibronectin type III; TM, transmembrane; HKRP, Hook-related protein. Differences between isoforms are shown below. (D,E,G,H) Quantification of (D,G) URX and (E,H) BAG dendrite lengths, expressed as a percentage of the distance from cell body to nose. Colored bars represent individual dendrites ( $n \geq 48$  per genotype); black bars represent population averages. Shaded region represents wild-type mean  $\pm$  5 s.d. for each neuron type and the percentage of dendrites in this range ('full-length dendrites') is indicated below the plots. Wild-type quantification is the same as in Fig. 2.

**URX and BAG dendrite development requires SAX-7 and GRDN-1**

To this end, we performed visual forward genetic screens for mutants in which URX or BAG dendrites fail to fully extend (see Materials and Methods). In separate screens focused on each neuron, we isolated eight URX and two BAG dendrite extension

mutants (Fig. 3A, URX; Fig. 3B, BAG). Each of the mutants exhibits grossly normal body morphology, locomotion and expression of URX- and BAG-specific markers (*flp-8*, URX; *flp-17*, BAG; *egl-13*, URX and BAG), and ILso glia still extend their processes to the nose (Fig. S2). Together, these observations suggest that the dendrite extension defects are not secondary to pleiotropic abnormalities in



morphogenesis, neurodevelopment or cell fate specification. Interestingly, we found that most of the URX mutants also strongly affect BAG, and vice versa, suggesting that these neurons may employ closely related mechanisms of dendrite extension (Fig. 3). We found that our ten mutants represented two complementation groups, and we proceeded to identify the relevant genes.

### SAX-7

Using standard mapping approaches, we found that alleles in the first complementation group (*hmn3*, *hmn12*, *hmn147* and *hmn159*) disrupt *sax-7*, which encodes a transmembrane cell-adhesion molecule related to mammalian L1CAM (Fig. 3C) (Zallen et al., 1999; Chen et al., 2001; Sasakura et al., 2005). L1CAM is expressed throughout the brain and plays several roles during development, including in neuron-glia adhesion (Grumet and Edelman, 1984; Stoeckli et al., 1997). Defects in L1CAM lead to X-linked hydrocephalus (L1 syndrome), a highly variable disorder that can also include spastic paraplegia and intellectual disability (Jouet et al., 1994; Vits et al., 1994; Adle-Biassette et al., 2013). How loss of L1CAM leads to such a broad spectrum of phenotypes remains mysterious. Interestingly, L1CAM is also expressed in some epithelial tissues, but less is known about its roles in this context (Debiec et al., 1998; Nolte et al., 1999; Pechriggl et al., 2017).

In *C. elegans*, SAX-7 affects the development and maintenance of many aspects of nervous system organization, including axon guidance, synapse function, dendrite fasciculation, axon and neuronal cell body positioning, and the spatial patterning of branched dendrite arbors (Zallen et al., 1999; Kim and Li, 2004; Sasakura et al., 2005; Bénard et al., 2012; Dong et al., 2013; Salzberg et al., 2013; Opperman et al., 2015; Yip and Heiman, 2018; Chen et al., 2019; Ramirez-Suarez et al., 2019). In these contexts, SAX-7 has been shown to physically interact with UNC-44/ankyrin, STN-2/ $\gamma$ -syntrophin, the transmembrane protein DMA-1 and the contactin RIG-6 (Zhou et al., 2008; Liu and Shen, 2011; Dong et al., 2013; Salzberg et al., 2013; Kim and Emmons, 2017). However, we found that mutations in these genes do not recapitulate the dendrite extension defects seen in *sax-7* (Fig. S3A).

All of our *sax-7* alleles cause dendrite extension defects in both URX and BAG (Fig. 3D,E), with BAG exhibiting defects that are more severe in both penetrance and expressivity. For example, in *sax-7(hmn12)*, dendrite extension defects occur in 87% of BAG neurons versus 67% of URX neurons, and the affected BAG dendrites are  $59\pm 19\%$  of nose length versus  $81\pm 10\%$  for URX. Each of our alleles is predicted to disrupt both the short (SAX-7S) and long (SAX-7L) isoforms, whereas an allele that disrupts only the SAX-7L isoform (*nj53*) has no effect on URX or BAG dendrite length (Fig. S3A) (Sasakura et al., 2005). Surprisingly, two of the alleles we isolated (*hmn12* and *hmn159*) result in an identical nucleotide change, despite arising from separate screens focused on URX and BAG, respectively; a previously described allele (*ky146*) also results in the same codon change (Zallen et al., 1999). These alleles are predicted to truncate the protein prior to its transmembrane segment and are thus expected to be functional nulls (Sasakura et al., 2005). We have used *sax-7(hmn12)* throughout this study.

### GRDN-1

Alleles in the second complementation group (*ns302*, *ns303*, *hmn1*, *hmn4*, *hmn7* and *hmn8*) disrupt *grdn-1* (Fig. 3F), which is predicted to encode a soluble cytoplasmic protein related to mammalian Girdin/CCDC88A (hence '*grdn-1*'), CCDC88B, CCDC88C and

other members of the Hook-related protein family (HKRP). Their roles in brain development have not been fully explored, but Girdin can promote long-range neuronal migration by affecting cell adhesion and, separately, can affect synaptic plasticity (Enomoto et al., 2009; Wang et al., 2011; Nakai et al., 2014; Itoh et al., 2016). Loss of Girdin/CCDC88A causes PEHO syndrome, characterized by progressive encephalopathy and optic atrophy (Nahorski et al., 2016). Intriguingly, loss of CCDC88C leads to congenital hydrocephalus similar to that seen in loss of L1CAM/SAX-7 (Ekici et al., 2010; Drielsma et al., 2012; Ruggeri et al., 2018), although no relationship between CCDC88C and L1CAM has been identified previously.

In *C. elegans*, GRDN-1 acts through CHE-10/Rootletin in ciliated sensory neurons to position the ciliary basal body and promote proper cilia development (Nechipurenko et al., 2016). However, we found that neither URX nor BAG dendrite lengths are affected by *che-10* (Fig. S3B), suggesting that the URX and BAG dendrite defects are unlikely to be secondary to the CHE-10-dependent role of GRDN-1 in cilia.

Quantification of our allelic series revealed that most *grdn-1* alleles strongly affect both URX and BAG (Fig. 3G,H); however, in contrast to what we observed with *sax-7*, the *grdn-1* defects are always more severe in URX. Indeed, two alleles (*ns302* and *hmn8*) produce barely discernible effects on BAG, despite having a strong effect on URX. Conversely, the allele with the most penetrant BAG defects (*hmn4*) exhibits the least penetrant URX defects, albeit still quite severe. These results suggest that, although they require the same factors for dendrite extension, URX and BAG are likely to exhibit some developmental differences.

Importantly, a *grdn-1* deletion allele (*tm6493*) causes completely penetrant embryonic lethality (Nechipurenko et al., 2016), suggesting this gene plays an essential role in early development. This leads to three inferences. First, our genetic approach has revealed a role in dendrite development that would have been precluded from study using a null allele. Second, because our mutants are viable (*ns303*, <2% embryonic lethality,  $n=138$ ), they presumably retain some *grdn-1* activity (i.e. they are hypomorphic alleles). Third, these alleles might therefore provide clues as to which isoforms or protein regions are specifically required for dendrite extension and not for other aspects of early development. For example, all of our alleles disrupt the GRDN-1a isoform, while some of them (*ns303*, *ns302*, *hmn7* and *hmn8*) spare the GRDN-1b or GRDN-1c isoforms. This suggests that GRDN-1a is likely the most relevant for dendrite extension and that neither GRDN-1b nor GRDN-1c is sufficient. Consistent with this prediction, we found that GRDN-1a cDNA can rescue URX dendrite extension in the *grdn-1(ns303)* background (Fig. S4). Interestingly, one allele that strongly affects URX – but not BAG – dendrite extension (*hmn8*) is predicted to truncate GRDN-1 just 26 amino acids from its C terminus. This short region includes a PDZ domain-binding motif (Gly-Cys-Val), suggesting that this motif is required for URX dendrite extension but not for other aspects of early development. Consistent with this prediction, deleting this motif from the GRDN-1a cDNA abrogates its ability to rescue URX dendrite extension defects (Fig. S4). We chose to focus on the *ns303* allele, as it is predicted to truncate GRDN-1a close to its N terminus (after the first seven codons) and causes highly penetrant defects in both URX and BAG without embryonic lethality.

In summary, it is intriguing that our screen exclusively identified alleles of *sax-7* and *grdn-1*, and that similar phenotypes are not caused by mutations in known factors that interact with SAX-7 and GRDN-1 during neuronal development.

However, in addition to their roles in neurons, SAX-7 and GRDN-1 are also expressed broadly in epithelial tissues during embryonic development (Chen et al., 2001; Nechipurenko et al., 2016). An interesting possibility is that factors that interact with them during epithelial development might promote URX and BAG dendrite extension but were not identified in our screens due to other essential roles.

### SAX-7 and GRDN-1 are not broadly required for dendrite extension

As SAX-7 and GRDN-1 both act broadly in development, we sought to determine whether their function in dendrite extension is specific to URX and BAG. We therefore asked whether *sax-7* or *grdn-1* affect the morphogenesis of other sensory neurons that extend unbranched dendrites to the nose.

First, we examined a panel of strains bearing cell type-specific fluorescent markers for three of the 12 amphid neurons, as well as three other classes of sensory neuron that extend dendrites through glial pores (CEP, IL and OL). We found that most of these neurons are unaffected by *sax-7* and *grdn-1* (Fig. 4B,D).

However, the amphid neurons AWA and AWB exhibited weakly penetrant dendrite extension defects in *grdn-1* (Fig. 4, Fig. S5), consistent with a previous report that noted aberrant branching and other morphological defects (Nechipurenko et al., 2016). These defects could reflect a primary role for GRDN-1 during AWA and AWB dendrite extension, or could be secondary to defects in basal body positioning in these neurons, as many mutants that disrupt the ciliary basal body or transition zone also produce some amphid dendrite defects [CHE-10, Fig. S3B; MKS-1 and NPHP-4 (Williams et al., 2008); CCEP-290, MKSR-2 and NPHP-4 (Schouteden et al., 2015); MKS-5, MKS-6, NPHP-1 and NPHP-4 (Williams et al., 2011)]. Importantly, we found that AWA and AWB dendrite lengths are not affected by *sax-7*, and another amphid neuron (AWC) exhibits no detectable dendrite extension defects in either mutant (Fig. S5).

We also examined URY, another neuron that extends an unbranched dendrite to the nose. Like URX and BAG, the URY dendrite ending interacts closely with some glia (although not the ILso glia) but does not enter a glial pore, is not exposed to the

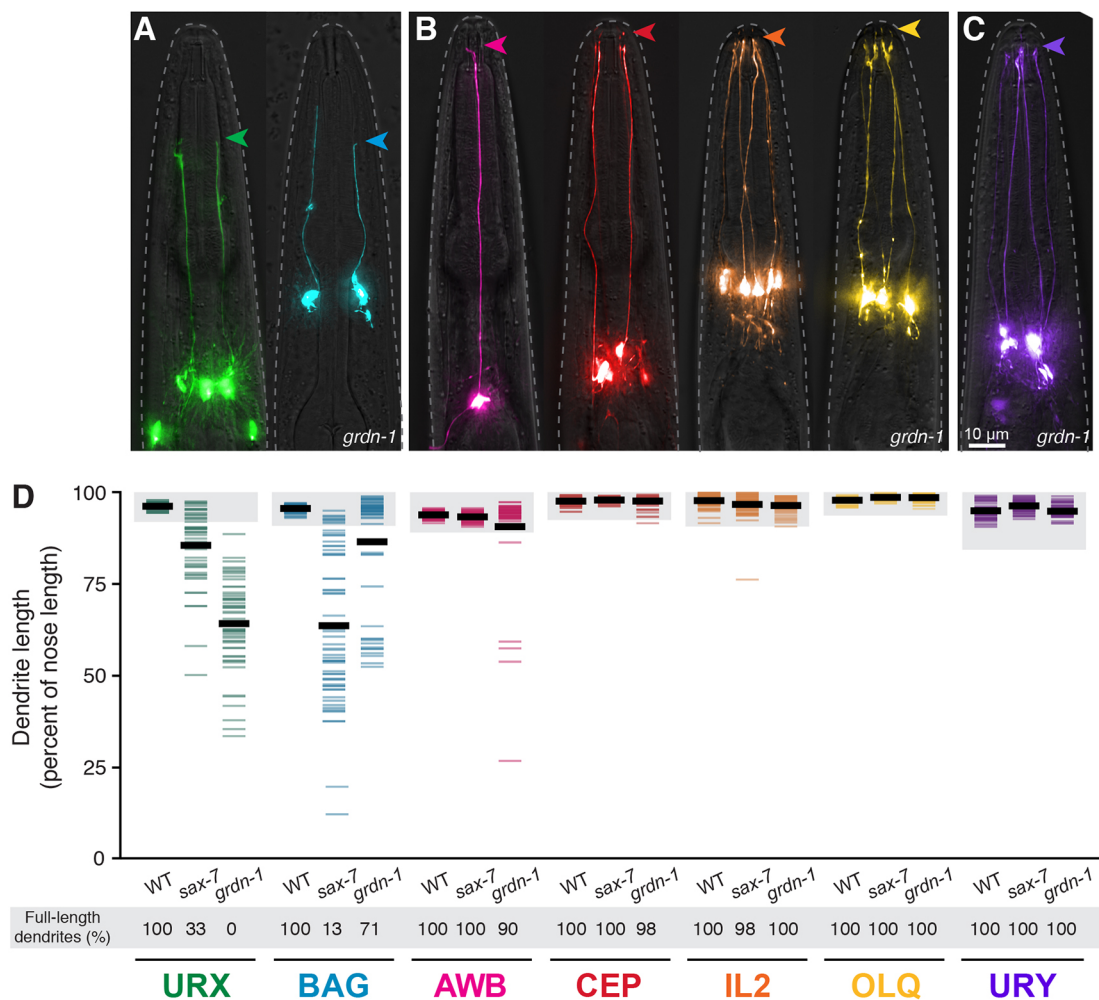

**Fig. 4. *sax-7* and *grdn-1* preferentially affect URX and BAG dendrite extension.** (A,B) *grdn-1* animals expressing fluorescent markers for (A) neurons that make specialized wrapping contacts with the ILso glia [URX (green, *flp-8pro*) and BAG (blue, *flp-17pro*)]; (B) neurons that enter glial pores [amphid (AWB, pink, *str-1pro*); two additional amphid neurons, AWA and AWC, are in Fig. S5], CEP (red, *dat-1pro*), IL2 (orange, *k1p-6pro*) and OLQ (yellow, *ocr-4pro*); and (C) a neuron that does neither [URY (purple, *tol-1pro*)]. Arrowheads indicate dendrite endings. (D) Quantification of dendrite lengths in the indicated genotypes, expressed as a percentage of the distance from cell body to nose. Colored bars represent individual dendrites ( $n \geq 47$  per genotype); black bars represent population averages. Shaded region represents wild-type mean  $\pm$  s.d. for each neuron type and the percentage of dendrites in this range ('full-length dendrites') is indicated below the plots. URX and BAG quantification is the same as in Figs 2 and 3.

external environment, and does not require *DYF-7* (Ward et al., 1975; Doroquez et al., 2014; Low et al., 2019). We found that URX dendrite extension is not affected by either *sax-7* or *grdn-1* (Fig. 4C,D).

Thus, despite the widespread roles of *sax-7* and *grdn-1* in developmental patterning, their effects on dendrite extension appear relatively restricted to URX and BAG, and might reflect mechanisms specific to how these neurons form their dendrites.

### SAX-7 and GRDN-1 promote dendrite growth during embryo elongation

To determine how URX and BAG form their dendrites – and, in particular, whether they develop by retrograde extension – we visualized dendrite development in wild-type and mutant embryos using a fluorescent reporter expressed in these neurons shortly after their birth (*egl-13pro::GFP*) (Fig. 5) (Gramstrup Petersen et al., 2013). URX and BAG develop at a stage when the embryo rapidly twitches, making imaging difficult. We employed two approaches to circumvent this problem. First, we used dual-view inverted selective-plane illumination microscopy (diSPIM) (Wu et al., 2011; Kumar et al., 2014), which allows optical volumes to be acquired faster than the embryo twitches, to perform time-lapse imaging of a small number of embryos (Fig. S6, Movies 1 and 2). However, owing to the variability of the mutant phenotype across individuals, we also wanted to use a method that would allow sampling of larger

populations. We therefore took advantage of our previous anecdotal observations that ultraviolet light causes rapid embryonic arrest (see Materials and Methods), and used this approach to arrest and image >70 wild-type or mutant embryos at various developmental stages. We then arranged these embryos into a pseudo-timecourse based on the highly stereotyped developmental features of *C. elegans* embryogenesis (Fig. 5A-C).

In wild-type embryos, at the earliest stages where we can conclusively identify URX and BAG, the dendrites of both neurons are partially extended and contact the presumptive nose (Fig. 5A). At this stage, neither cell has a migratory appearance – e.g. they lack the lamellipod-like structure seen in developing amphid neurons (Heiman and Shaham, 2009), and BAG has already extended a short medial axon. Interestingly, the dendrite endings do not converge, suggesting that their shared attachments to the lateral ILso glial cell observed in the mature structure may not have developed yet. Next, as embryo elongation begins, the dendrites appear to stretch as the distance from the cell bodies to the nose increases (Fig. 5B). We found that dendrites increase at least fivefold in length during this period, from ~5–10  $\mu\text{m}$  to ~50  $\mu\text{m}$ , exactly keeping pace with the increasing distance from the cell bodies to the nose (Fig. 5C,G,H). Thus, URX and BAG develop using retrograde extension, with the nascent dendrites attaching near the presumptive nose and then growing by stretch as the cell bodies move farther away during embryo elongation.

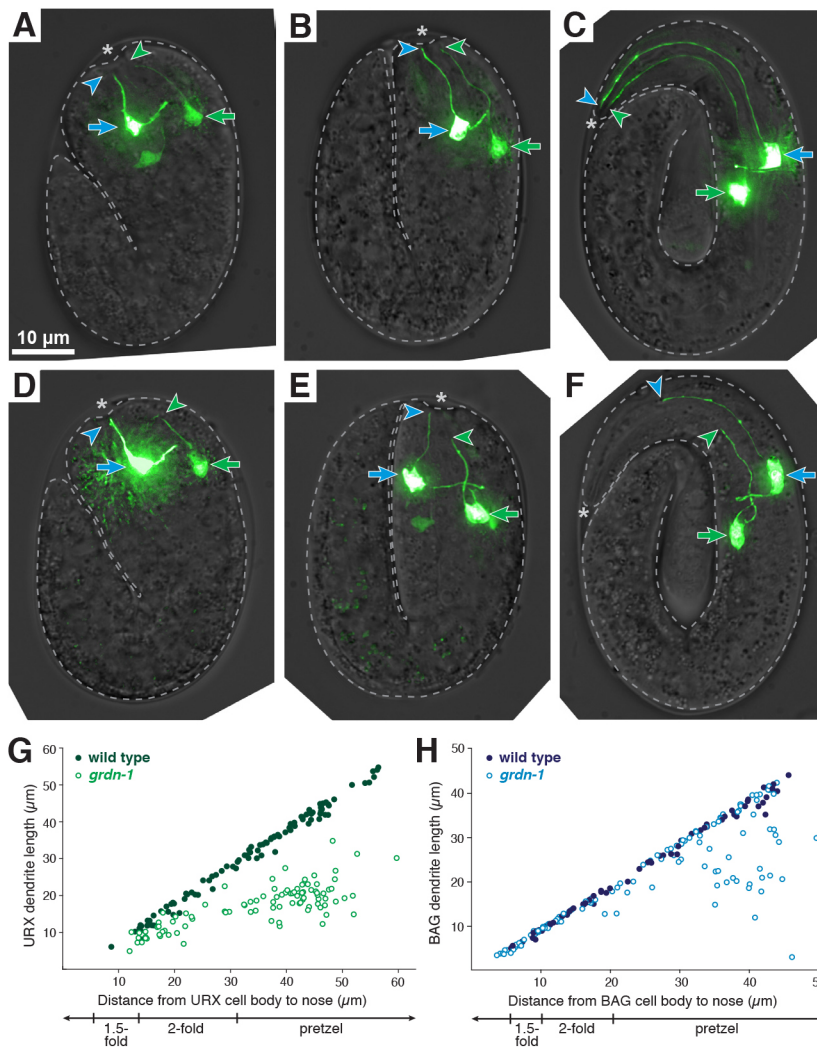

**Fig. 5. URX and BAG dendrite length defects arise during embryo elongation.** (A-F) URX and BAG dendrite extension in (A-C) wild-type and (D-F) *grdn-1* embryos at (A,D) 1.5-fold, (B,E) 2-fold and (C,F) pretzel stages. Embryonic URX and BAG were visualized using *egl-13pro::GFP* and distinguished by their cell body positions (URX cell body is more posterior, green arrow; BAG cell body, blue arrow). URX and BAG dendrite endings are marked with green and blue arrowheads, respectively. Asterisk indicates embryo nose. (G,H) Dendrite lengths plotted as a function of the distance from cell body to nose for (G) URX and (H) BAG in wild-type (filled circles) and *grdn-1* (open circles) embryos.  $n \geq 70$  per genotype.



To determine whether *sax-7* and *grdn-1* are required for this form of retrograde extension, we examined the development of mutant embryos. We focused on *grdn-1* for analysis, because the URX phenotype is fully penetrant, but we also observed similar results with *sax-7* (Fig. S6). In *grdn-1* embryos, we found that URX and BAG initially adopt their normal polarized morphology and form nascent dendrites that contact the presumptive nose (Fig. 5D). However, during embryo elongation, the dendrite endings become displaced from the nose and fail to extend normally (Fig. 5E,F). URX dendrites remained in contact with the nose up to a length of ~15–20  $\mu\text{m}$ ; however, as embryo elongation proceeded, they failed to maintain contact with the nose and were always shorter than wild type (Fig. 5G). BAG dendrites exhibited less penetrant defects, consistent with the lower penetrance observed in the mature structure. Similar to URX, dendrite extension defects in BAG were almost never seen at earlier stages (cell body <20  $\mu\text{m}$  from the nose) but, as embryo elongation proceeded, ~30% of dendrites became displaced from the nose (Fig. 5H). Thus, URX and BAG dendrite endings anchor to the presumptive nose using SAX-7 and GRDN-1, a mechanism of retrograde extension that is molecularly distinct from that employed by amphid neurons. An intriguing possibility is that contacts with glia are responsible for dendrite tip anchoring; however, because we do not have tools to visualize ILso glia in the embryo, we cannot directly test this idea. It is also possible that URX and BAG dendrites attach to other partners during development and then attain their specialized glial contacts later.

Finally, we asked how *sax-7* and *grdn-1* affect the post-embryonic scaling of dendrite length. Within ~48 h of hatching, the head increases twofold in length as animals grow from the first (L1) to fourth (L4) larval stage. We found that mutant dendrites generally scaled appropriately to keep pace with larval growth over this period, despite their overall shorter lengths (Fig. S7A). We also noted that URX and BAG dendrite lengths were uncorrelated, suggesting that defects in URX are not secondary consequences of defects in BAG, or vice versa (Fig. S7B). Together, our results imply that *sax-7* and *grdn-1* specifically disrupt the retrograde extension of URX and BAG dendrites during embryo elongation.

### SAX-7 can act both in neurons and glia to promote URX and BAG dendrite extension

Because vertebrate homologs of SAX-7 can mediate neuron-glia adhesion, we reasoned that SAX-7 might also mediate neuron-glia adhesion to anchor dendrites at the developing nose. To test this idea, we expressed SAX-7 cDNA under neuron- or glia-specific promoters in a *sax-7* mutant background and quantified the number of full-length URX and BAG dendrites. As a positive control, we observed nearly complete rescue when SAX-7 cDNA was placed under control of a broadly expressed embryonic promoter (Fig. 6A,B, *grdn-1*pro). We found that expression using URX-, BAG- or glia-specific promoters (*flp-8*pro, URX; *flp-17*pro, BAG; and *itx-1*pro, glia) (Kim and Li, 2004; Haklai-Topper et al., 2011) produced moderate rescue, whereas combined expression in URX and glia, or BAG and glia, produced much more efficient rescue (neurons with full-length dendrites: 92%, URX; 78%, BAG) (Fig. 6A,B). The lack of complete rescue could reflect additional roles for SAX-7 in other cell types, or issues related to the developmental timing of the cell-specific promoters we used. These results suggest that SAX-7 promotes dendrite anchoring by acting both in the URX and BAG neurons, as well as in glia.

Next, to ask whether SAX-7 localizes to specific regions within glia, we expressed a functional YFP-tagged SAX-7 cDNA under control of a glial-specific promoter (*itx-1*pro), together with myristyl-mCherry (myr-mCherry) as a reference (Fig. 6C). We found that SAX-7 localizes across the glial surface and often appears enriched at sites near the nose (Fig. 6C). This enrichment was not seen in all individuals, but is consistent with the possibility that SAX-7 could directly mediate dendrite-glia attachment.

### GRDN-1 can act non-autonomously in glia to promote dendrite extension

Next, we performed a similar analysis of GRDN-1. In contrast to the above results, we observed almost no rescue, or even mildly enhanced defects, when the GRDN-1a cDNA was placed under control of URX- or BAG-specific promoters (Fig. 7A, Fig. S8A). This suggests that GRDN-1, unlike SAX-7, does not act in the neurons themselves to promote dendrite extension. We recapitulated

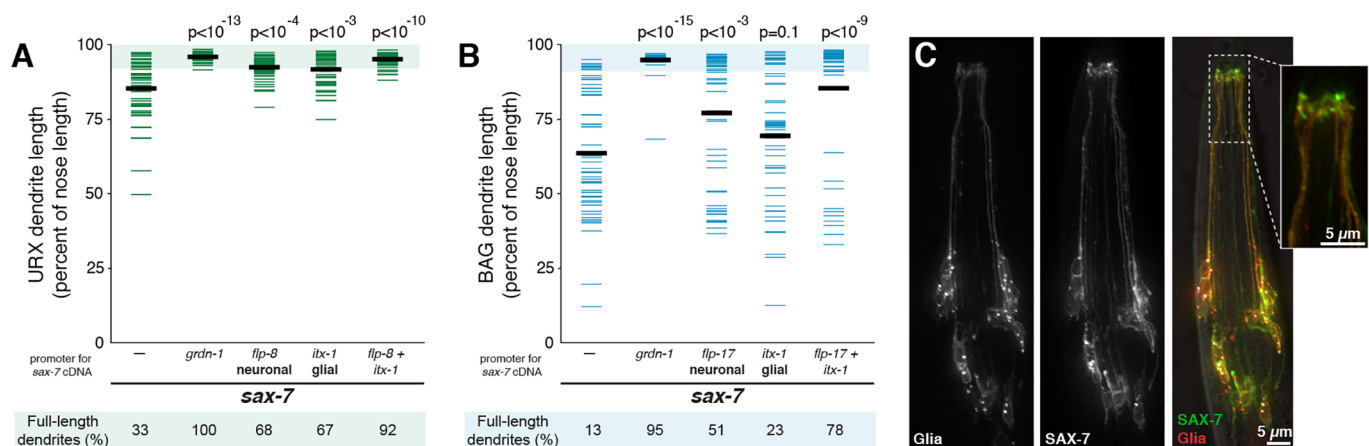

**Fig. 6. SAX-7 can act both in neurons and glia to promote dendrite extension.** (A,B) Transgenes containing SAX-7S cDNA under the control of promoters expressed in neurons, glia, both together, or no transgene (–, same data as Fig. 3), were introduced into *sax-7* animals. (A) URX and (B) BAG dendrite lengths were measured in each strain as a percentage of the distance from cell body to nose. Colored bars represent individual dendrites ( $n \geq 49$  per genotype); black bars represent population averages. *P*-values (Wilcoxon Rank Sum test) compared with *sax-7* with no transgene (–) are shown at the top. Rescue was greater when SAX-7S cDNA was expressed in neurons and glia together compared with neurons only (URX,  $P < 10^{-5}$ ; BAG,  $P < 10^{-3}$ ) or glia only (URX,  $P < 10^{-4}$ ; BAG,  $P < 10^{-5}$ ). Shaded region represents wild-type mean  $\pm$  5 s.d. for each neuron type and the percentage of dendrites in this range ('full-length dendrites') is indicated below the plots. (C) Single-wavelength and merged images of animals expressing SAX-7S-YFP and the membrane marker myristyl-mCherry under control of a glia-specific promoter (*itx-1*pro). Inset shows that SAX-7S-YFP is sometimes enriched in glial endings, where the glia contact URX and BAG.

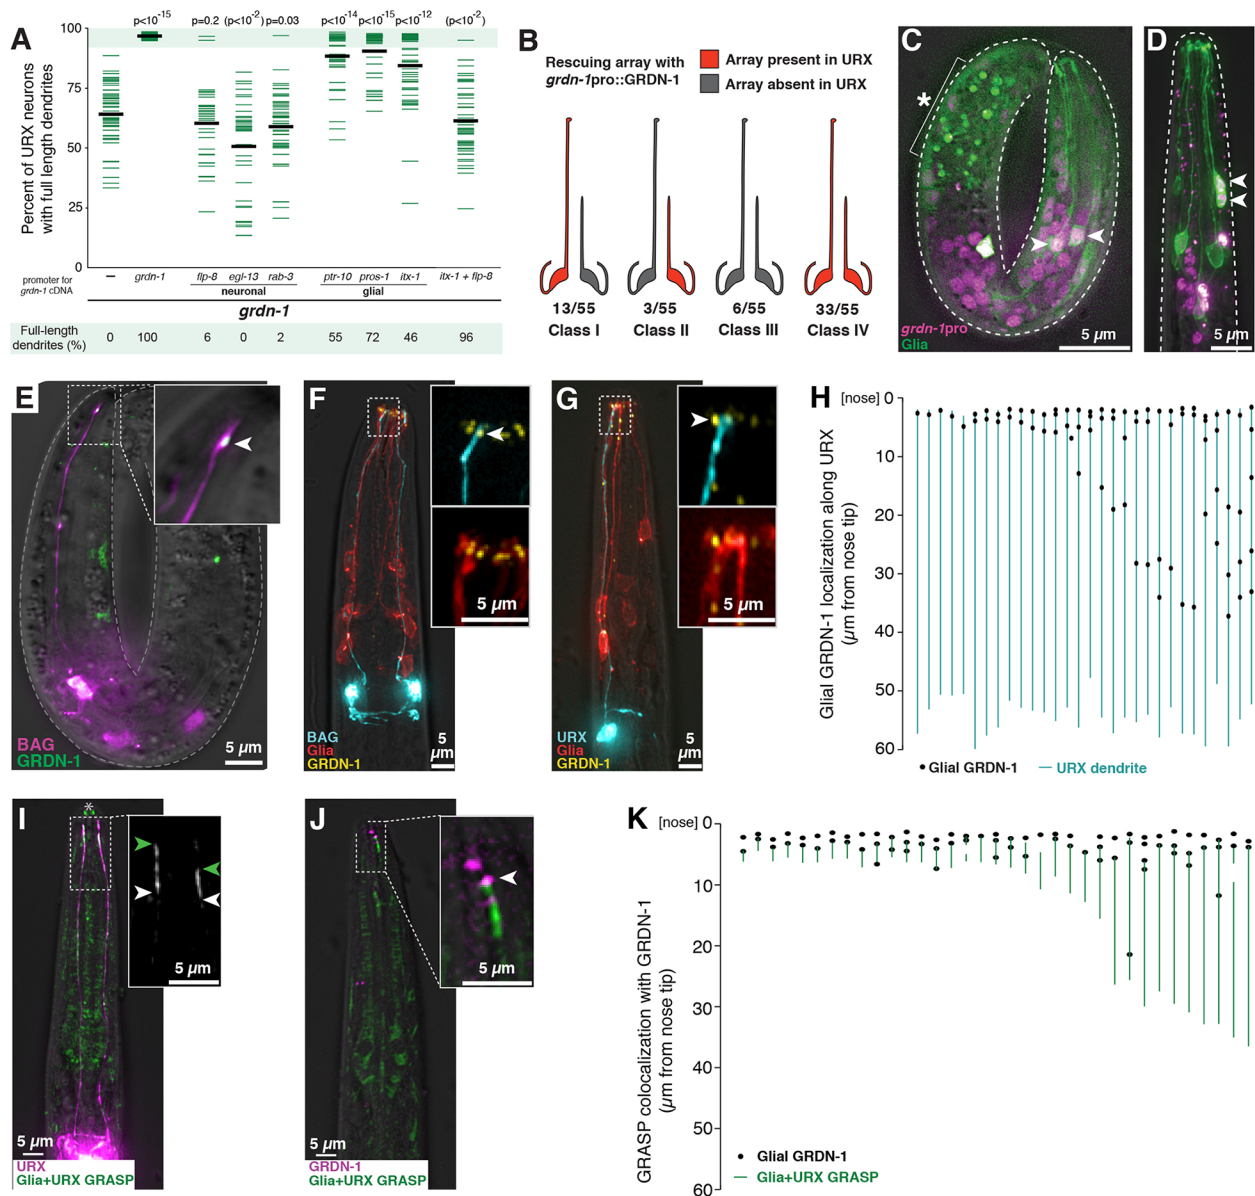

**Fig. 7. GRDN-1 can act in glia and localizes in puncta at dendrite contacts.** (A) Transgenes containing GRDN-1a cDNA under control of the indicated promoters, or no transgene (–, same data as Fig. 3), were introduced into *grdn-1* animals and URX dendrite lengths were measured as a percentage of the distance from the cell body to the nose. *P*-values (Wilcoxon Rank Sum test) compared with *grdn-1* with no transgene (–) are shown at the top. Parentheses indicate that, for unknown reasons, expression using *egl-13*pro enhances the defects. Colored bars represent individual dendrites ( $n \geq 34$  per genotype); black bars represent population averages. Shaded region represents wild-type mean  $\pm$  5 s.d. and the percentage of dendrites in this range ('full-length dendrites') is indicated below the plots. Data for BAG are in Fig. S8. (B) Mosaic analysis was performed using *grdn-1* animals bearing a stably integrated URX marker (*flp-8*pro:GFP) to assess dendrite length and an extrachromosomal transgene, which is subject to stochastic loss during cell division, containing *grdn-1*pro:GRDN-1a and the URX marker *flp-8*pro:CFP to assess the ability of GRDN-1 to act cell-autonomously. Animals in which only the left or right URX dendrite was full-length were selected as probable mosaics, and were scored for the presence (red) or absence (gray) of the rescuing array in each URX neuron. (C, D) Wild-type embryo (C) and L1 stage larva (D) expressing a histone-mCherry fusion protein under control of the *grdn-1* promoter (*grdn-1*pro:*his-24-mCherry*, magenta) and a membrane-localized GFP to mark glia (*itx-1*pro:myristyl-GFP, green). Arrowheads indicate glial examples of cells expressing both markers. Asterisk and bracket indicate background auto-fluorescence due to gut granules. (E–G) The localization of glial-expressed GRDN-1a relative to URX and BAG was visualized (E) in embryos, by expressing sfGFP-GRDN-1a in glia (*itx-1*pro, green) together with an embryonic BAG marker (*egl-13*pro:mCherry, purple); and (F, G) in L1 stage larvae, by expressing YFP-GRDN-1a (*itx-1*pro, yellow) and myristyl-mCherry (*itx-1*pro, red) in glia together with CFP (blue) in BAG (F, *flp-17*pro) or URX (G, *flp-8*pro). Arrowheads indicate glial-expressed puncta of GRDN-1a near dendrite endings. (H) The positions of glial-expressed GRDN-1a puncta were quantified relative to the URX dendrite. Each line represents a single URX dendrite and adjacent GRDN-1a puncta are shown as black dots.  $n=30$ . (I, J) GRDN-1a puncta were visualized relative to the dendrite-glia contact. (I) Regions of direct dendrite-glia contact were visualized using a GFP-reconstitution assay (GRASP) targeting URX and glia (*itx-1*pro:CD4-spGFP1-10 and *flp-8*pro:CD4-spGFP11, green). URX is also marked by mCherry (*flp-8*pro, magenta). Green and white arrowheads mark the anterior and posterior extents of the GRASP signal. Owing to the faint signal, prominent autofluorescence at the mouth (asterisk) and elsewhere in the head is visible. (J) The localization of glial-expressed GRDN-1a relative to the URX-glia contact was visualized by expressing mApple-GRDN-1a in glia (*itx-1*pro, magenta) together with GRASP (green). Arrowhead indicates glial-expressed punctum of GRDN-1a at the anterior extent of the dendrite-glia contact revealed by GRASP. (K) The positions of glial-expressed GRDN-1a puncta were quantified relative to the dendrite-glia contact. Each line represents one URX-glia pair, as revealed by GRASP, and adjacent mApple-GRDN-1a puncta are shown as black dots. Multiple dots may reflect expression of the promoter in several ( $\sim 6$ –12) glial cells.  $n=35$ .

this result using two other neuronal promoters (*egl-13pro*, which is expressed in URX and BAG shortly after the cells are born; and *rab-3pro*, which is pan-neuronal) (Fig. 7A, Fig. S8A) (Nonet et al., 1997; Gramstrup Petersen et al., 2013).

By comparison, we observed moderate rescue of URX dendrite extension using any of three glial promoters (neurons with full-length dendrites: 55%, *ptr-10pro*; 72%, *pros-1pro*; and 46%, *itx-1pro*) (Fig. 7A) (Yoshimura et al., 2008; Haklai-Topper et al., 2011; Murray et al., 2012). As discussed above, incomplete rescue could be due to inappropriate timing of expression or a requirement for *grdn-1* in additional cells. These results suggest that GRDN-1 is able to act non-autonomously in glia to promote URX dendrite anchoring.

Because *grdn-1* causes more weakly penetrant defects in BAG, we could not determine its site of action for BAG dendrite anchoring. However, we note that some glial promoters resulted in partial rescue of BAG comparable with that seen for URX – e.g. *ptr-10pro*:GRDN-1 reduced the fraction of affected dendrites by about half in both cases (BAG, 16% affected compared with 29% in controls, Fig. S8A; URX, 45% affected compared with 100% in controls, Fig. 7A). For reasons we do not understand, combined expression of GRDN-1 in neurons and glia abrogated the rescue, or was even slightly detrimental, for both URX and BAG dendrite extension (Fig. 7A, Fig. S8A).

To further test whether GRDN-1 acts non-autonomously, we used mosaic analysis to interrogate the activity of *grdn-1* expressed under control of its own promoter (Fig. 7B). Briefly, we generated *grdn-1* animals bearing an unstable extrachromosomal transgene consisting of *grdn-1pro*:GRDN-1a cDNA and a fluorescent reporter (*flp-8pro*:CFP) used to visualize the presence of this transgene in URX. To identify rare mosaic animals in which the transgene has undergone stochastic loss in certain cell lineages, we isolated individuals in which the left- and right-hand URX neurons are of different lengths (i.e. one short dendrite and one full-length dendrite). We reasoned that, if *grdn-1* acts cell-autonomously, then the URX neuron with a full-length dendrite would always carry the transgene [*grdn-1*(+), Fig. 7B, red], while the neuron with a short dendrite would almost always lack the transgene [*grdn-1*(–), Fig. 7B, gray]. However, in addition to this class of animals (class I, 23%), we also observed two classes of animals in which URX neurons had full-length dendrites but lacked the transgene (classes II and III, 16% together), indicating that *grdn-1* is not necessary in URX for rescue (Fig. 7B). Similarly, we observed two classes of animals in which URX neurons had short dendrites despite carrying the transgene (Classes II and IV, 65% together), indicating that *grdn-1* is not sufficient in URX for rescue (Fig. 7B). These results support the conclusion that *grdn-1* promotes URX dendrite extension in a non-autonomous manner.

Finally, we asked whether *grdn-1* is normally expressed in glia. We generated a *grdn-1* transcriptional reporter and found that it is broadly expressed in the embryo from late gastrulation onwards. By co-expressing a glial marker in embryos [*itx-1pro* (1 kb), see Materials and Methods], we found that this expression includes a subset of glia (Fig. 7C). This expression can be detected in newly hatched animals (Fig. 7D) but is absent in older larvae and adults. Importantly, *grdn-1* does not grossly disrupt the specification or morphogenesis of these glia (Fig. S2B), although the protrusions at the glial ending appeared to be diminished or absent when URX and BAG dendrites were both short (Fig. S8C).

Taken together, our results suggest that *grdn-1* is expressed broadly at the time of dendrite extension, including in glia, and that its expression in glia is sufficient to non-autonomously promote dendrite extension.

### GRDN-1 localizes in glia to puncta near dendrite contacts

To examine GRDN-1 localization, we generated a functional GFP-tagged GRDN-1a cDNA. Consistent with previous results, we observed numerous puncta at the nose when this construct was expressed under its own promoter (Fig. S8B). These puncta were previously shown to localize to the basal bodies at the ciliated endings of sensory dendrites (Nechipurenko et al., 2016). However, as glia are not ciliated, we were curious about how GRDN-1 would localize in these cells. We therefore expressed GFP-GRDN-1 under the control of a glial-specific promoter. In embryos and newly hatched larvae, we found that glial GRDN-1 localizes in puncta near URX and BAG dendrite endings (Fig. 7E–G). This localization did not depend on *sax-7* (Fig. S8D). Quantifying the positions of puncta relative to the URX dendrite revealed that the dendrite always terminates near a punctum of glial GRDN-1 ( $n=30/30$ , Fig. 7H).

Because these puncta were not bright enough for the structured illumination approach we used previously, we developed an alternative strategy to test whether they represent dendrite-glia contacts. Briefly, we adapted the GRASP system in which complementary fragments of GFP are expressed on the surfaces of neighboring cells, such that fluorescence is reconstituted only where the cells come into molecular contact (Feinberg et al., 2008). We expressed the GRASP fragments in URX and glia (URX+Glia GRASP) together with a reference marker in URX. We observed GRASP signal ranging in length from ~3 to 30  $\mu\text{m}$  along the distal dendrite (Fig. 7I), consistent with our structured illumination images showing the distal region of URX tightly bundled with the ILso glia. As a control, no signal was observed when either GFP fragment was expressed alone. By expressing this GRASP reporter together with glial-specific mApple-GRDN-1, we found that the GRDN-1 puncta almost always mark the anterior extent of the dendrite-glia contact ( $n=34$  of 35 animals; Fig. 7J,K). Thus, distinct from its role at basal bodies in ciliated neurons, GRDN-1 localizes in glia to puncta positioned at dendrite-glia contacts.

## DISCUSSION

### A novel molecular mechanism for retrograde extension

Here, we have established a novel genetic model for dissecting dendrite-glia interactions at the single cell level. We find that the mature URX and BAG dendrites form specialized membranous contacts with a single glial cell, the lateral ILso. During development, these dendrites grow by retrograde extension, attaching near the nose and then stretching out during embryo elongation. Dendrite anchoring requires the neuron-glia adhesion molecule SAX-7, as well as GRDN-1, which can act non-autonomously in glia and localizes in puncta near dendrite-glia contacts. In the absence of these factors, dendrites detach from the nose and do not properly extend during embryo elongation. Thus, this study identifies conserved factors that may promote dendrite-glia adhesion in order to drive dendrite growth by retrograde extension.

Interestingly, this represents a novel molecular mechanism for retrograde extension. While URX and BAG superficially resemble the amphid and other sensory neurons – they extend unbranched dendrites to the nose where they interact with glia – they exhibit highly divergent features and develop using distinct cellular and molecular mechanisms (Fig. 8). Amphid dendrites develop as part of an epithelium: they are exposed to the environment, form epithelial tight junctions with neighboring glia, exhibit apical-basal polarity and develop using apical ECM factors that resemble those found in other epithelia (Low et al., 2019). In contrast, URX and BAG are not exposed to the environment, do not form tight



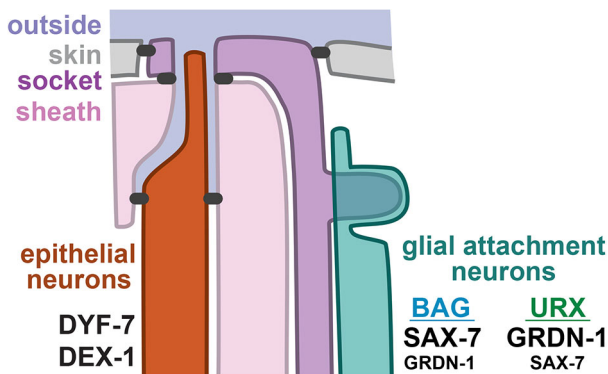

**Fig. 8. Distinct molecular mechanisms of retrograde extension.** Different classes of head sensory neurons undergo retrograde extension using distinct cellular and molecular mechanisms. Epithelial neurons (24 amphid, 12 IL, six OL and four CEP) exhibit tight junctions (black) that separate an outward- or luminal-facing apical surface from a basal surface that is exposed to the pseudocoelom, and undergo retrograde extension through mechanisms that resemble the morphogenesis of narrow epithelial tubes, including the use of apical extracellular matrix proteins (DYF-7 and DEX-1). In contrast, glial attachment neurons (two BAG, two URX) undergo retrograde extension using a distinct molecular mechanism in which SAX-7 and GRDN-1 anchor dendrite endings at the developing nose. BAG exhibits a greater dependence on SAX-7, while URX exhibits a greater dependence on GRDN-1. Dendrite extension in the other unbranched sensory neurons of the head (four URA, two URB and four URY) remains to be explored.

junctions and do not require the apical ECM factors employed by the amphid (Ward et al., 1975; Doroquez et al., 2014). URX and BAG dendrites instead attach to the basolateral surface of ILso glia and develop using SAX-7 and GRDN-1, conserved molecules that promote cell adhesion in the mammalian brain. Interestingly, retrograde extension has recently been observed in the developing zebrafish nervous system (Breau et al., 2017), suggesting that this strategy for neurite growth may be more widespread than was previously appreciated. It will be important to determine whether SAX-7/GRDN-1-dependent mechanisms also mediate retrograde extension in vertebrates, or if there are yet other molecular mechanisms for retrograde extension.

Interestingly, the URX dendrite is not restricted to growing only by retrograde extension. The dendrite ending continues to grow in adults (Cohn et al., 2020). We previously identified a separate class of dendrite overgrowth mutants in which the URX dendrite forms normally during embryogenesis but then gets longer as the animal ages, ultimately wrapping around the nose and extending posteriorly along the head, up to 150% of its wild-type length (McLachlan et al., 2018). These results suggest a possible developmental switch from retrograde extension in the embryo to tip-directed anterograde extension in larvae and adults. In the developing zebrafish nervous system, axons that initially grow by retrograde extension later undergo a second phase of anterograde growth, during which they grow away from the surface of the brain and towards their targets within it (Breau et al., 2017). This suggests that a developmental switch between retrograde and anterograde growth may also be conserved across species.

The model of dendrite-glia interaction we have established may also provide insight into other aspects of mammalian brain development. L1CAM/SAX-7 and CCDC88C/GRDN-1 are two of the genes most frequently disrupted in congenital hydrocephalus, a rare developmental brain disorder (Drielsma et al., 2012; Adle-Biassette et al., 2013; Nahorski et al., 2016). Could the molecular mechanisms for congenital hydrocephalus be related to the

overlapping roles of SAX-7 and GRDN-1 described here? Congenital hydrocephalus is characterized by enlargement of the brain ventricles, which arise developmentally from the lumen of the embryonic neural tube. Loss of CCDC88C leads to apical constriction defects in the neuroepithelial cells that line the lumen of the developing neural tube, and to planar cell polarity (PCP) defects in the epithelial radial glial cells that subsequently line the surfaces of newly formed ventricles (Takagishi et al., 2017; Marivin and Garcia-Marcos, 2019; Marivin et al., 2019). These defects are not obviously related to the phenotypes described here. However, it is intriguing to note that ILso is an epithelial glial cell. It is therefore possible that it shares some underlying developmental features with vertebrate neuroepithelial cells or epithelial radial glia.

#### Possible molecular mechanisms for SAX-7 and GRDN-1

By what molecular mechanism do SAX-7 and GRDN-1 promote dendrite extension? A simple hypothesis would be that they form a protein complex that attaches URX and BAG dendrites to the lateral ILso glial cell. However, several lines of evidence suggest that the mechanism is more complicated. First, SAX-7 and GRDN-1 do not have domains known to interact with each other and, in contrast to what would be expected for two members of a protein complex, they do not exhibit the same localization pattern in glia. Second, loss of SAX-7 is not phenotypically equivalent to loss of GRDN-1 – e.g. SAX-7 more strongly affects BAG while GRDN-1 more strongly affects URX – which likely would not be the case if these genes acted in a single complex. Third, embryonic BAG and URX dendrites do not converge to a single site at the nose, as would be expected if they were both already attached to the lateral ILso glial cell, suggesting the dendrites might transiently attach to different cellular partners during development before attaining their mature structure. These observations suggest that SAX-7 and GRDN-1 may act in parallel, rather than in a single complex, to promote dendrite extension.

A possible clue to their mechanism of action may come from studies of epithelial development, in which each of these proteins has been found to act upstream of epithelial cell junctions. SAX-7 is expressed broadly in epithelia, localizes to epithelial cell junctions, and can act redundantly with the classical epithelial cell junction protein HMR-1/cadherin during early development (Chen et al., 2001; Grana et al., 2010). GRDN-1 is partly required for localization of the epithelial cell junction marker AJM-1 and, in *Drosophila*, Girdin localizes to epithelial adherens junctions, physically interacts with the cadherin-catenin complex protein  $\alpha$ -catenin, and is required to maintain epithelial cell adhesion during large-scale morphogenetic movements (Ha et al., 2015; Houssin et al., 2015; Nechipurenko et al., 2016).

These observations suggest two possibilities. First, URX and BAG dendrites might attach to glia through modified epithelial junctions, e.g. using the same cell junction machinery as epithelia but in an attenuated form that is more susceptible to disruption. This is an attractive idea because neurons and glia derive developmentally and evolutionarily from epithelia and many glia retain epithelial characteristics (including ILso, as well as radial glia and Müller glia in vertebrates). Alternatively, URX and BAG dendrites might develop using bona fide epithelial interactions that are lost as the structure matures. Recent studies have shown that other *C. elegans* neurons engage in transient cellular rosettes, in which cells polarize towards a central vertex and exhibit epithelial characteristics before resolving into their mature arrangement (Fan et al., 2019). It will therefore be paramount to identify the

early cell-cell interactions that shape URX and BAG, and to understand how they give rise to the specialized dendrite-glia contacts observed in the mature structure.

## MATERIALS AND METHODS

### Strains and plasmids

All *C. elegans* strains were constructed in the N2 background and cultured at 20°C on nematode growth media (NGM) plates seeded with *E. coli* OP50 bacteria (Brenner, 1974). Transgenic strains were generated with standard techniques (Mello and Fire, 1995) with injection of 100 ng/μl of DNA (5–50 ng per plasmid). Information for all strains used in this study is listed in Table S1, plasmids are listed in Table S2 and primers of general interest are listed in Table S3.

### Generation of glial expression constructs

To visualize inner and outer labial glial cells, we amplified a ~2.9 kb promoter fragment upstream of *itx-1* from N2 genomic DNA and used it to drive the expression of GFP. Consistent with published results (Haklai-Topper et al., 2011), this promoter drives expression in glial cells and throughout the gut. As the strong gut expression obscured signal from the head in embryos, we identified a 1031 bp region beginning at the 5' end of the ~2.9 kb *itx-1* promoter that drives expression in glia, but not in the gut, when placed upstream of a *myo-2* minimal promoter (Okkema et al., 1993). See Table S3 for primer sequences.

To visualize inner labial socket glial cells specifically, we used a promoter fragment from the *grl-18* gene that was reported to be expressed in a combination of IL or OL socket glia (Hao et al., 2006). We amplified a ~3 kb promoter fragment upstream of *grl-18* from N2 genomic DNA and used it to drive expression of YFP. To confirm expression in IL socket glia, we co-expressed *grl-18pro:YFP* with the BAG reporter *flp-17pro:CFP* and the IL2 neuron reporter *kfp-6pro:mCherry*. We found that the IL2 neurons protrude through the *grl-18*<sup>+</sup> cells and that BAG neurons associate with the YFP-labeled cells, thus demonstrating that the *grl-18* promoter drives expression specifically in IL socket glia.

### Forward genetic screens

We isolated alleles of *grdn-1* and *sax-7* in three independent, nonclonal, visual genetic screens. In all screens, L4 stage animals were mutagenized using 70 mM ethyl methanesulfonate (EMS, Sigma) at ~22°C for 4 h. Nonclonal F2 progeny were examined on a Nikon SMZ1500 stereomicroscope with an HR Plan Apo 1.6× objective, and animals with aberrant dendrite morphologies were recovered to individual plates. For details of mutations, see Table S4. *ns302* and *ns303* were isolated from a screen for URX dendrite defects in genotype *ynIs78 X (flp-8pro:GFP)*; *hmn1*, *hmn3*, *hmn4*, *hmn7*, *hmn8* and *hmn12* were isolated from a separate screen for URX dendrite defects in genotype *ynIs78 X (flp-8pro:GFP)*; and *hmn147* and *hmn159* were isolated from a screen for BAG dendrite defects in genotype *oyIs82 X (flp-17pro:GFP)*.

### Genetic mapping of mutations

With standard linkage mapping and SNP analysis, we mapped *ns303* to an interval between 18.57 Mb and 18.70 Mb on chromosome V. Genomic sequence analysis identified a mutation (W8stop) in the previously uncharacterized gene *Y51A2D.15*, which we named *grdn-1*. As no fosmid covering this region was available, we confirmed this as the causative mutation by rescuing the URX dendrite extension phenotype with a GRDN-1a cDNA driven by a ~4.5 kb *grdn-1* promoter (see Fig. 7A; primer sequences used to amplify this promoter are in Table S3). Additional *grdn-1* alleles from the screens were identified by non-complementation to *ns303* and confirmed by Sanger sequencing.

*hmn3* was mapped to a ~1 Mb interval on chromosome IV containing *sax-7* by a one-step whole-genome-sequencing and SNP mapping strategy (Doitsidou et al., 2010). Sequence analysis identified a candidate mutation in *sax-7*, and we confirmed this mutation by rescuing the URX dendrite extension phenotype in *hmn3* with the WRM0631cG07 fosmid and by non-complementation to the previously described *sax-7(ky146)* allele (Zallen et al., 1999) (for *ky146* males×*hmn3* hermaphrodites and *hmn3*/+

males×*ky146* hermaphrodites, 23/44 and 6/29 URX dendrites failed to extend, respectively). Additional *sax-7* alleles were identified by non-complementation to *hmn3* and confirmed by Sanger sequencing.

### Conventional light microscopy and image processing

Larval animals were immobilized with sodium azide, mounted on 2% agar or agarose pads and covered with a #1.5 coverslip. To image embryos, adult hermaphrodites were dissected to release early-stage embryos, which were then mounted in water on slides with 2% agarose pads and covered with a #1.5 coverslip. Young embryos (prior to twitching, ~1.5-fold) were imaged live, but older embryos were arrested to prevent movement. Embryo arrest was accomplished by applying 15–50 1 sec pulses of 405 nm excitation light; this treatment reliably caused embryo twitching movements to cease within 20 min without morphological damage to the neurons of interest.

Image stacks were collected on a DeltaVision Core deconvolution imaging system (Applied Precision) with the InsightSSI light source; UApo 40×/1.35 NA oil immersion objective, PlanApo 60×/1.42 NA oil immersion objective or UPlanSApo 100×/1.40 NA oil immersion objective (Olympus); the standard DeltaVision live cell excitation and emission filter set; and a Photometrics CoolSnap HQ2 CCD camera (Roper Scientific). Image stacks were acquired and deconvolved with Softworx 5.5 (Applied Precision).

Cross-sections were generated using the Rotate3D Tool in Priism 4.4.0 (Chen et al., 1996). Maximum intensity projections were generated with contiguous optical sections in ImageJ (Fiji), then linearly adjusted for brightness in Adobe Photoshop CS5. Multicolored images were created by placing each channel in a separate false-colored screen layer in Photoshop. Figures were assembled in Adobe Illustrator CS5.

### Quantification of dendrite lengths

Dendrite lengths were measured using the segmented line tool in ImageJ (NIH). The dendrite was traced from the point where it joins the cell body to the point where it ends at the nose, then normalized by the distance from the cell body to the nose to account for variance in the size of the animal. All dendrite lengths were measured in L4 stage animals, except where noted. To assess the correlation between URX and BAG dendrite defects, ipsilateral URX and BAG dendrite lengths were quantified and R<sup>2</sup> values were calculated for a linear regression model created in Numbers (Apple).

### Dual-inverted selective plane illumination microscopy

Light sheet microscopy of wild-type and *grdn-1(ns303)* embryos expressing the BAG and URX reporter *egl-13(3 kb)pro:GFP* was performed on a dual-inverted selective plane illumination microscope (Applied Scientific Instrumentation) (Kumar et al., 2014), although only a single imaging view was used for all experiments presented here. Laser lines (488 and 561 nm) from an Agilent laser launch were fiber-coupled into the MEMS-mirror scanhead, used to create a virtually swept light sheet. A pair of perpendicular water-dipping, long-working distance objectives (NIR APO 40×, 0.8 NA; MRD07420, Nikon) were used to illuminate the sample and to collect the resulting fluorescence. All laser lines were reflected with a quad-pass ZT405/488/561/640rpev2 dichroic and emission was selected with a ZET405/488/561/635M filter (Chroma) before detection on an sCMOS camera (ORCA Flash v2.0; Hamamatsu). Optical stacks were acquired by sweeping the sheet in conjunction with the detection plane (controlled using a piezo motor) through the sample. Before embryonic twitching began, when *egl-13pro:GFP* expression is dimmest, volumes of ~65 z-slices (step size 0.75 μm) were acquired at 5 min intervals with a 150 ms exposure. Once twitching began, volumes were acquired at 5 s intervals with a 20–40 ms exposure. For data acquisition and instrument control, we used the ASI dual-inverted selective plane illumination microscopy (diSPIM) plug-in within MicroManager (Edelstein et al., 2014).

Maximum intensity projections were generated and intensities were linearly adjusted using ImageJ (NIH). Images (8-bit) were saved as TIF files in an image sequence. Annotation was added using Adobe Photoshop CS5. The image sequence was then loaded into ImageJ and saved as a movie with a frame rate of 6 frames/s.

### 3D-structured illumination microscopy (3D-SIM)

To visualize the full membranous elaborations of BAG and URX, as well as ILso glia, we expressed combinations of cytoplasmic, membrane-anchored and ciliary reporters under cell-specific promoters (BAG: *flp-17pro:Gcy-9-mApple*, *flp-17pro:mApple* and *flp-17pro:myr-mApple*; URX: *flp-8pro:mApple* and *flp-8pro:myr-mApple*; ILso glia: *grl-18pro:GFP* and *grl-18pro:myr-GFP*) (Hao et al., 2006; Gramstrup Petersen et al., 2013; Smith et al., 2013). We found that visualizing the ciliary ‘bag’ of BAG required expression of the membrane-associated ciliary marker Gcy-9-mApple.

L4 larvae grown at 20°C were anesthetized in 110 mM sodium azide and 20 mM levamisole in M9, then mounted with #1.5 coverslips on 3% agarose pads with 110 mM sodium azide. Imaging was performed on an OMX V4 Blaze microscope (GE Healthcare) equipped with three watercooled PCO.edge sCMOS cameras, 488 and 568 nm lasers, and 528/48 and 609/37 emission filters (Omega Optical). Images were acquired with a 60×/1.42 NA Plan Apochromat objective (Olympus) and a final pixel size of 80 nm. Optical stacks of ~3–6 μm were acquired with a z-step of 125 nm and with 15 raw images per plane (three angles with five phases each). Spherical aberration was minimized using immersion oil matching (Hiraoka et al., 1990); generally, oil with a refractive index of 1.522 worked well. Super-resolution images were computationally reconstructed from the raw data sets with a channel-specific, measured optical transfer function and a Wiener filter constant of 0.001 using custom-written 3D-SIM reconstruction code (T. Lambert, Harvard Medical School, Boston, MA, USA) based on Gustafsson et al. (2008). Images are displayed as maximum intensity projections generated in ImageJ from contiguous optical sections, except Fig. 2B (as described below). Negative intensity values were eliminated and images were saved as 8-bit files. Fig. 2B was generated using the Oblique Slicer tool in Imaris (Bitplane) to rotate the image volume in 3D. It was then linearly adjusted for brightness, captured using the Snap tool and saved as an 8-bit file. All images were then imported into Photoshop CS5 and linearly adjusted for brightness. Multicolored images were created by placing each channel in a separate false-colored screen layer in Photoshop. Figures were assembled in Adobe Illustrator CS5.

### Mosaic analysis of GRDN-1 activity

Animals of genotype *grdn-1(ns303) V; ynIs78 X (flp-8pro:GFP)* carried an unstable extrachromosomal transgene array that included the fully rescuing *grdn-1pro:GRDN-1a* construct and *flp-8pro:CFP*. To obtain animals that were mosaic for the presence of the array without bias with regard to the presence of the array in URX, we selected animals in which one URX dendrite was full length and one was short, scored using only the integrated GFP marker on a fluorescence-equipped dissecting stereomicroscope. Each mosaic animal was then mounted on a slide and imaged as described above (see ‘Conventional Microscopy and Image Processing’), with each URX neuron scored for the presence or absence of the array as indicated by the expression of *flp-8pro:CFP*.

### Quantification of GRDN-1 puncta and URX+Glia GRASP

To quantify the localization of GRDN-1 puncta relative to the URX dendrite (Fig. 7H), we imaged L1 stage animals expressing *flp-8pro:CFP*, *itx-1pro:YFP-GRDN-1* and *itx-1pro:myr-mCherry*. A segmented line was drawn in ImageJ along the URX dendrite, from the point closest to the nose until the point where it joins the cell body. The beginning and end points of the URX dendrite were measured. When a punctum of glial YFP-GRDN-1 was directly adjacent to the URX dendrite in the x-, y- or z-dimension, it was scored as an adjacent punctum and its position along the URX dendrite was recorded.

To quantify the extent of URX+Glia GRASP and the relative localization of GRDN-1 (Fig. 7K), we used a similar approach. However, because we could not concurrently label the URX dendrite, we could not measure GRDN-1 puncta associated with URX posterior to the GRASP signal and we could not be certain that all GRDN-1 puncta at the nose tip were associated with URX. Therefore, we measured and plotted all puncta at the nose tip, as they were typically in the same z-plane as puncta that clearly associated with the GRASP signal; this causes a discrepancy in the number of puncta at the nose between Fig. 7I and K.

### Statistical analysis

The data were initially recorded in Microsoft Excel or Apple Numbers using the methods described above, and statistical analysis was performed using R version 3.2.3 ([www.r-project.org/](http://www.r-project.org/)) or RStudio version 1.0.143 ([www.rstudio.com/](http://www.rstudio.com/)).

### Acknowledgements

We thank Valeri Thomson for assistance with the genetic screen that isolated *ns302* and *ns303*, and Shai Shaham for generously providing laboratory resources, advice and supervision in support of the isolation and initial characterization of these mutants; Anique Olivier-Mason, Inna Nechipurenko and Piali Sengupta for sharing reagents, unpublished information and comments on the manuscript; John Murray for advice on promoter expression patterns; Ikue Mori for *sax-7* cDNA; Cori Bargmann for GRASP constructs; Chris Li for advice and reagents related to *flp-8* and *flp-17*; Alex Boyanov and Oliver Hobert for whole-genome sequencing; Talley Lambert, Anna Payne-Tobin Jost, and Jennifer Waters (Harvard Medical School Cell Biology Microscopy Facility) for their assistance with diSPIM and SIM acquisition; Lin Shao (Yale University) for the CUDA-accelerated 3D-SIM reconstruction code; and Lisa Goodrich and members of the Heiman laboratory for comments on the manuscript. Some strains were provided by the CGC, which is funded by National Institutes of Health Office of Research Infrastructure Programs (P40 OD010440).

### Competing interests

The authors declare no competing or financial interests.

### Author contributions

Investigation: E.R.C., I.G.M.; Writing - original draft: E.R.C., I.G.M., M.G.H.; Writing - review & editing: E.R.C., I.G.M., M.G.H.; Supervision: M.G.H.; Funding acquisition: E.R.C., I.G.M., M.G.H.

### Funding

We are grateful for funding from the National Science Foundation Graduate Research Fellowship Program (I.G.M. and E.R.C.), from the National Institutes of Health (F31NS103371 to E.R.C., R01GM108754 to M.G.H. and R01NS112343 to M.G.H.) and from a March of Dimes Foundation Basil O'Connor Starter Scholar Research Award (M.G.H.). Deposited in PMC for release after 12 months.

### Supplementary information

Supplementary information available online at <http://dev.biologists.org/lookup/doi/10.1242/dev.180448.supplemental>

### References

- Adele-Biasette, H., Able, S. P., Fallet-Bianco, C., Delezoide, A.-L., Razavi, F., Drouot, N., Bazin, A., Beaufrère, A.-M., Bessièrès, B., Blesson, S. et al. (2013). Neuropathological review of 138 cases genetically tested for X-linked hydrocephalus: evidence for closely related clinical entities of unknown molecular bases. *Acta Neuropathol.* **126**, 427–442. doi:10.1007/s00401-013-1146-1
- Ango, F., Wu, C., Van der Want, J. J., Wu, P., Schachner, M. and Huang, Z. J. (2008). Bergmann glia and the recognition molecule CHL1 organize GABAergic axons and direct innervation of Purkinje cell dendrites. *PLoS Biol.* **6**, e103. doi:10.1371/journal.pbio.0060103
- Bénard, C. Y., Blanchette, C., Recio, J. and Hobert, O. (2012). The secreted immunoglobulin domain proteins ZIG-5 and ZIG-8 cooperate with L1CAM/SAX-7 to maintain nervous system integrity. *PLoS Genet.* **8**, e1002819. doi:10.1371/journal.pgen.1002819
- Bernardinelli, Y., Randall, J., Janett, E., Nikonenko, I., König, S., Jones, E. V., Flores, C. E., Murai, K. K., Bochet, C. G., Holtmaat, A. et al. (2014). Activity-dependent structural plasticity of perisynaptic astrocytic domains promotes excitatory synapse stability. *Curr. Biol.* **24**, 1679–1688. doi:10.1016/j.cub.2014.06.025
- Breau, M. A., Bonnet, I., Stoufflet, J., Xie, J., De Castro, S. and Schneider-Maunoury, S. (2017). Extrinsic mechanical forces mediate retrograde axon extension in a developing neuronal circuit. *Nat. Commun.* **8**, 282. doi:10.1038/s41467-017-00283-3
- Brenner, S. (1974). The genetics of *Caenorhabditis elegans*. *Genetics* **77**, 71–94.
- Bretscher, A. J., Kodama-Namba, E., Busch, K. E., Murphy, R. J., Soltesz, Z., Laurent, P. and de Bono, M. (2011). Temperature, oxygen, and salt-sensing neurons in *C. elegans* are carbon dioxide sensors that control avoidance behavior. *Neuron* **69**, 1099–1113. doi:10.1016/j.neuron.2011.02.023
- Carmona, M. A., Murai, K. K., Wang, L., Roberts, A. J. and Pasquale, E. B. (2009). Glial ephrin-A3 regulates hippocampal dendritic spine morphology and glutamate transport. *Proc. Natl. Acad. Sci. USA* **106**, 12524–12529. doi:10.1073/pnas.0903281106
- Chen, H., Hughes, D. D., Chan, T.-A., Sedat, J. W. and Agard, D. A. (1996). IVE (Image Visualization Environment): a software platform for all three-dimensional microscopy applications. *J. Struct. Biol.* **116**, 56–60. doi:10.1006/j.sbi.1996.0010



- Chen, L., Ong, B. and Bennett, V. (2001). LAD-1, the *Caenorhabditis elegans* L1CAM homologue, participates in embryonic and gonadal morphogenesis and is a substrate for fibroblast growth factor receptor pathway-dependent phosphotyrosine-based signaling. *J. Cell Biol.* **154**, 841-856. doi:10.1083/jcb.200009004
- Chen, C.-H., Hsu, H.-W., Chang, Y.-H. and Pan, C.-L. (2019). Adhesive L1CAM-robo signaling aligns growth cone F-actin dynamics to promote axon-dendrite fasciculation in *C. elegans*. *Dev. Cell* **48**, 215-228.e5. doi:10.1016/j.devcel.2018.10.028
- Cheung, B. H. H., Arellano-Carbajal, F., Rybicki, I. and de Bono, M. (2004). Soluble guanylate cyclases act in neurons exposed to the body fluid to promote *C. elegans* aggregation behavior. *Curr. Biol.* **14**, 1105-1111. doi:10.1016/j.cub.2004.06.027
- Cohn, J. A., Cebul, E. R., Valperga, G., Brose, L., do Bono, M., Heiman, M. G. and Pierce, J. T. (2020). Long-term activity drives dendritic branch elaboration of a *C. elegans* sensory neuron. *Dev. Biol.* doi:10.1016/j.ydbio.2020.01.005
- Debiec, H., Christensen, E. I. and Ronco, P. M. (1998). The cell adhesion molecule L1 is developmentally regulated in the renal epithelium and is involved in kidney branching morphogenesis. *J. Cell Biol.* **143**, 2067-2079. doi:10.1083/jcb.143.7.2067
- Doitsidou, M., Poole, R. J., Sarin, S., Bigelow, H. and Hobert, O. (2010). *C. elegans* mutant identification with a one-step whole-genome-sequencing and SNP mapping strategy. *PLoS ONE* **5**, e15435. doi:10.1371/journal.pone.0015435
- Dong, X., Liu, O. W., Howell, A. S. and Shen, K. (2013). An extracellular adhesion molecule complex patterns dendritic branching and morphogenesis. *Cell* **155**, 296-307. doi:10.1016/j.cell.2013.08.059
- Doroquez, D. B., Berciu, C., Anderson, J. R., Sengupta, P. and Nicastro, D. (2014). A high-resolution morphological and ultrastructural map of anterior sensory cilia and glia in *Caenorhabditis elegans*. *eLife* **3**, e01948. doi:10.7554/eLife.01948
- Drielsma, A., Jalas, C., Simonis, N., Désir, J., Simanovsky, N., Pirson, I., Elpeleg, O., Abramowicz, M. and Edvardson, S. (2012). Two novel CCDC88C mutations confirm the role of DAPLE in autosomal recessive congenital hydrocephalus. *J. Med. Genet.* **49**, 708-712. doi:10.1136/jmedgenet-2012-101190
- Edelstein, A. D., Tsuchida, M. A., Amodaj, N., Pinkard, H., Vale, R. D. and Stuurman, N. (2014). Advanced methods of microscope control using  $\mu$ Manager software. *J. Biol. Methods* **1**, e10. doi:10.14440/jbm.2014.36
- Ekici, A. B., Hilfinger, D., Jatzwauk, M., Thiel, C. T., Wenzel, D., Lorenz, I., Boltshauser, E., Goecke, T. W., Staatz, G., Morris-Rosendahl, D. J. et al. (2010). Disturbed Wnt signalling due to a mutation in CCDC88C causes an autosomal recessive non-syndromic hydrocephalus with medial diverticulum. *Mol. Syndromol.* **1**, 99-112. doi:10.1159/000319859
- Enomoto, A., Asai, N., Namba, T., Wang, Y., Kato, T., Tanaka, M., Tatsumi, H., Taya, S., Tsuboi, D., Kuroda, K. et al. (2009). Roles of disrupted-in-schizophrenia 1-interacting protein girdin in postnatal development of the dentate gyrus. *Neuron* **63**, 774-787. doi:10.1016/j.neuron.2009.08.015
- Fan, L., Kovacevic, I., Heiman, M. G. and Bao, Z. (2019). A multicellular rosette-mediated collective dendrite extension. *eLife* **8**, e38065. doi:10.7554/eLife.38065
- Feinberg, E. H., Vanhoven, M. K., Bendesky, A., Wang, G., Fetter, R. D., Shen, K. and Bargmann, C. I. (2008). GFP Reconstitution Across Synaptic Partners (GRASP) defines cell contacts and synapses in living nervous systems. *Neuron* **57**, 353-363. doi:10.1016/j.neuron.2007.11.030
- Gramstrup Petersen, J., Rojo Romanos, T., Joozaityte, V., Redo Riveiro, A., Hums, I., Traunmüller, L., Zimmer, M. and Pockock, R. (2013). EGL-13/SoxD specifies distinct O2 and CO2 sensory neuron fates in *Caenorhabditis elegans*. *PLoS Genet.* **9**, e1003511. doi:10.1371/journal.pgen.1003511
- Grana, T. M., Cox, E. A., Lynch, A. M. and Hardin, J. (2010). SAX-7/L1CAM and HMR-1/cadherin function redundantly in blastomere compaction and non-muscle myosin accumulation during *Caenorhabditis elegans* gastrulation. *Dev. Biol.* **344**, 731-744. doi:10.1016/j.ydbio.2010.05.507
- Gray, J. M., Karow, D. S., Lu, H., Chang, A. J., Chang, J. S., Ellis, R. E., Marletta, M. A. and Bargmann, C. I. (2004). Oxygen sensation and social feeding mediated by a *C. elegans* guanylate cyclase homologue. *Nature* **430**, 317-322. doi:10.1038/nature02714
- Gross, E., Soltesz, Z., Oda, S., Zelmanovich, V., Abergel, Z. and de Bono, M. (2014). GLOBIN-5-dependent O2 responses are regulated by PDL-1/PrBP that targets prenylated soluble guanylate cyclases to dendritic endings. *J. Neurosci.* **34**, 16726-16738. doi:10.1523/JNEUROSCI.5368-13.2014
- Grumet, M. and Edelman, G. M. (1984). Heterotypic binding between neuronal membrane vesicles and glial cells is mediated by a specific cell adhesion molecule. *J. Cell Biol.* **98**, 1746-1756. doi:10.1083/jcb.98.5.1746
- Gustafsson, M. G. L., Shao, L., Carlton, P. M., Wang, C. J. R., Golubovskaya, I. N., Cande, W. Z., Agard, D. A. and Sedat, J. W. (2008). Three-dimensional resolution doubling in wide-field fluorescence microscopy by structured illumination. *Biophys. J.* **94**, 4957-4970. doi:10.1529/biophysj.107.120345
- Ha, A., Polyansky, A. and Avidor-Reiss, T. (2015). Drosophila hook-related protein (Girdin) is essential for sensory dendrite formation. *Genetics* **200**, 1149-1159. doi:10.1534/genetics.115.178954
- Haklai-Topper, L., Soutschek, J., Sabanay, H., Scheel, J., Hobert, O. and Peles, E. (2011). The neurexin superfamily of *Caenorhabditis elegans*. *Gene Expr. Patterns* **11**, 144-150. doi:10.1016/j.gexp.2010.10.008
- Hallam, E. A. and Sternberg, P. W. (2008). Acute carbon dioxide avoidance in *Caenorhabditis elegans*. *Proc. Natl. Acad. Sci. USA* **105**, 8038-8043. doi:10.1073/pnas.0707469105
- Hao, L., Johnsen, R., Lauter, G., Baillie, D. and Bürglin, T. R. (2006). Comprehensive analysis of gene expression patterns of hedgehog-related genes. *BMC Genomics* **7**, 280. doi:10.1186/1471-2164-7-280
- Heiman, M. G. and Shaham, S. (2009). DEX-1 and DYF-7 establish sensory dendrite length by anchoring dendritic tips during cell migration. *Cell* **137**, 344-355. doi:10.1016/j.cell.2009.01.057
- Hiraoka, Y., Sedat, J. W. and Agard, D. A. (1990). Determination of three-dimensional imaging properties of a light microscope system. Partial confocal behavior in epifluorescence microscopy. *Biophys. J.* **57**, 325-333. doi:10.1016/S0006-3495(90)82534-0
- Hong, R. L., Riebesell, M., Bumbarger, D. J., Cook, S. J., Carstensen, H. R., Sarpolaki, T., Cochella, L., Castrejón, J., Moreno, E., Sieriebriennikov, B. et al. (2019). Evolution of neuronal anatomy and circuitry in two highly divergent nematode species. *eLife* **8**, e47155. doi:10.7554/eLife.47155
- Houssin, E., Tepass, U. and Laprise, P. (2015). Girdin-mediated interactions between cadherin and the actin cytoskeleton are required for epithelial morphogenesis in *Drosophila*. *Development* **142**, 1777-1784. doi:10.1242/dev.122002
- Itoh, N., Enomoto, A., Nagai, T., Takahashi, M. and Yamada, K. (2016). Molecular mechanism linking BDNF/TrkB signaling with the NMDA receptor in memory: the role of Girdin in the CNS. *Rev. Neurosci.* **27**, 481-490. doi:10.1515/revneuro-2015-0072
- Jouet, M., Rosenthal, A., Armstrong, G., MacFarlane, J., Stevenson, R., Paterson, J., Metzberg, A., Ionasescu, V., Temple, K. and Kenwright, S. (1994). X-linked spastic paraplegia (SPG1), MASA syndrome and X-linked hydrocephalus result from mutations in the L1 gene. *Nat. Genet.* **7**, 402-407. doi:10.1038/ng0794-402
- Kim, B. and Emmons, S. W. (2017). Multiple conserved cell adhesion protein interactions mediate neural wiring of a sensory circuit in *C. elegans*. *eLife* **6**, e29257. doi:10.7554/eLife.29257
- Kim, K. and Li, C. (2004). Expression and regulation of an FMR1-related neuropeptide gene family in *Caenorhabditis elegans*. *J. Comp. Neurol.* **475**, 540-550. doi:10.1002/cne.20189
- Kumar, A., Wu, Y., Christensen, R., Chandris, P., Gandler, W., McCreedy, E., Bokinsky, A., Colón-Ramos, D. A., Bao, Z., McAuliffe, M. et al. (2014). Dual-view plane illumination microscopy for rapid and spatially isotropic imaging. *Nat. Protoc.* **9**, 2555-2573. doi:10.1038/nprot.2014.172
- Lamkin, E. R. and Heiman, M. G. (2017). Coordinated morphogenesis of neurons and glia. *Curr. Opin. Neurobiol.* **47**, 58-64. doi:10.1016/j.conb.2017.09.011
- Laurent, P., Soltesz, Z., Nelson, G. M., Chen, C., Arellano-Carbajal, F., Levy, E. and de Bono, M. (2015). Decoding a neural circuit controlling global animal state in *C. elegans*. *eLife* **4**, e04241. doi:10.7554/eLife.04241
- Lippman, J. J., Lordkipanidze, T., Buell, M. E., Yoon, S. O. and Dunaevsky, A. (2008). Morphogenesis and regulation of Bergmann glial processes during Purkinje cell dendritic spine ensheathment and synaptogenesis. *Glia* **56**, 1463-1477. doi:10.1002/glia.20712
- Lippman Bell, J. J., Lordkipanidze, T., Cobb, N. and Dunaevsky, A. (2010). Bergmann glial ensheathment of dendritic spines regulates synapse number without affecting spine motility. *Neuron Glia Biol.* **6**, 193-200. doi:10.1017/S1740925X10000165
- Liu, O. W. and Shen, K. (2011). The transmembrane LRR protein DMA-1 promotes dendrite branching and growth in *C. elegans*. *Nat. Neurosci.* **15**, 57-63. doi:10.1038/nn.2978
- Lordkipanidze, T. and Dunaevsky, A. (2005). Purkinje cell dendrites grow in alignment with Bergmann glia. *Glia* **51**, 229-234. doi:10.1002/glia.20200
- Low, I. I. C., Williams, C. R., Chong, M. K., McLachlan, I. G., Wierbowski, B. M., Kolotuev, I. and Heiman, M. G. (2019). Morphogenesis of neurons and glia within an epithelium. *Development* **146**, dev171124. doi:10.1242/dev.171124
- Marivin, A. and Garcia-Marcos, M. (2019). DAPLE and MPDZ bind to each other and cooperate to promote apical cell constriction. *Mol. Biol. Cell* **30**, 1900-1910. doi:10.1091/mbc.E19-02-0091
- Marivin, A., Morozova, V., Walawalkar, I., Leyme, A., Kretov, D. A., Cifuentes, D., Dominguez, I. and Garcia-Marcos, M. (2019). GPCR-independent activation of G proteins promotes apical cell constriction in vivo. *J. Cell Biol.* **218**, 1743-1763. doi:10.1083/jcb.201811174
- McLachlan, I. G., Beets, I., de Bono, M. and Heiman, M. G. (2018). A neuronal MAP kinase constrains growth of a *Caenorhabditis elegans* sensory dendrite throughout the life of the organism. *PLoS Genet.* **14**, e1007435. doi:10.1371/journal.pgen.1007435
- Mello, C. and Fire, A. (1995). DNA transformation. *Methods Cell Biol.* **48**, 451-482. doi:10.1016/S0091-679X(08)61399-0
- Mizeracka, K. and Heiman, M. G. (2015). The many glia of a tiny nematode: studying glial diversity using *Caenorhabditis elegans*. *Wiley Interdiscip. Rev. Dev. Biol.* **4**, 151-160. doi:10.1002/wdev.171

- Murai, K. K., Nguyen, L. N., Irie, F., Yamaguchi, Y. and Pasquale, E. B. (2003). Control of hippocampal dendritic spine morphology through ephrin-A3/EphA4 signaling. *Nat. Neurosci.* **6**, 153-160. doi:10.1038/nn994
- Murray, J. I., Boyle, T. J., Preston, E., Vafeados, D., Mericle, B., Weisdepp, P., Zhao, Z., Bao, Z., Boeck, M. and Waterston, R. H. (2012). Multidimensional regulation of gene expression in the *C. elegans* embryo. *Genome Res.* **22**, 1282-1294. doi:10.1101/gr.131920.111
- Nahorski, M. S., Asai, M., Wakeling, E., Parker, A., Asai, N., Canham, N., Holder, S. E., Chen, Y.-C., Dyer, J., Brady, A. F. et al. (2016). CCDC88A mutations cause PEHO-like syndrome in humans and mouse. *Brain* **139**, 1036-1044. doi:10.1093/brain/aww014
- Nakai, T., Nagai, T., Tanaka, M., Itoh, N., Asai, N., Enomoto, A., Asai, M., Yamada, S., Saifullah, A. B., Sokabe, M. et al. (2014). Girdin phosphorylation is crucial for synaptic plasticity and memory: a potential role in the interaction of BDNF/TrkB/Akt signaling with NMDA receptor. *J. Neurosci.* **34**, 14995-15008. doi:10.1523/JNEUROSCI.2228-14.2014
- Nechipurenko, I. V., Olivier-Mason, A., Kazatskaya, A., Kennedy, J., McLachlan, I. G., Heiman, M. G., Blacque, O. E. and Sengupta, P. (2016). A conserved role for girdin in basal body positioning and ciliogenesis. *Dev. Cell* **38**, 493-506. doi:10.1016/j.devcel.2016.07.013
- Nishida, H. and Okabe, S. (2007). Direct astrocytic contacts regulate local maturation of dendritic spines. *J. Neurosci.* **27**, 331-340. doi:10.1523/JNEUROSCI.4466-06.2007
- Nolte, C., Moos, M. and Schachner, M. (1999). Immunolocalization of the neural cell adhesion molecule L1 in epithelia of rodents. *Cell Tissue Res.* **298**, 261-273. doi:10.1007/s004419900063
- Nonet, M. L., Staunton, J. E., Kilgard, M. P., Fergestad, T., Hartweg, E., Horvitz, H. R., Jorgensen, E. M. and Meyer, B. J. (1997). *Caenorhabditis elegans* rab-3 mutant synapses exhibit impaired function and are partially depleted of vesicles. *J. Neurosci.* **17**, 8061-8073. doi:10.1523/JNEUROSCI.17-21-08061.1997
- Okkema, P. G., Harrison, S. W., Plunger, V., Aryana, A. and Fire, A. (1993). Sequence requirements for myosin gene expression and regulation in *Caenorhabditis elegans*. *Genetics* **135**, 385-404.
- Opperman, K., Moseley-Allredge, M., Yochem, J., Bell, L., Kanayinkal, T. and Chen, L. (2015). A novel nondevelopmental role of the sax-7/L1CAM cell adhesion molecule in synaptic regulation in *Caenorhabditis elegans*. *Genetics* **199**, 497-509. doi:10.1534/genetics.114.169581
- Pechriggl, E. J., Concin, N., Blumer, M. J., Bitsche, M., Zwierzina, M., Dudas, J., Koziel, K., Altevogt, P., Zeimet, A.-G. and Fritsch, H. (2017). L1CAM in the early enteric and urogenital system. *J. Histochem. Cytochem.* **65**, 21-32. doi:10.1369/0022155416677241
- Perez-Alvarez, A., Navarrete, M., Covelo, A., Martin, E. D. and Araque, A. (2014). Structural and functional plasticity of astrocyte processes and dendritic spine interactions. *J. Neurosci.* **34**, 12738-12744. doi:10.1523/JNEUROSCI.2401-14.2014
- Ramirez-Suarez, N. J., Belalcazar, H. M., Salazar, C. J., Beyaz, B., Raja, B., Nguyen, K. C. Q., Celestrin, K., Fredens, J., Færgeman, N. J., Hall, D. H. et al. (2019). Axon-dependent patterning and maintenance of somatosensory dendritic arbors. *Dev. Cell* **48**, 229-244.e4. doi:10.1016/j.devcel.2018.12.015
- Ruggeri, G., Timms, A. E., Cheng, C., Weiss, A., Kollros, P., Chapman, T., Tully, H. and Mirzaa, G. M. (2018). Bi-allelic mutations of CCDC88C are a rare cause of severe congenital hydrocephalus. *Am. J. Med. Genet. A* **176**, 676-681. doi:10.1002/ajmg.a.38592
- Salzberg, Y., Diaz-Balzac, C. A., Ramirez-Suarez, N. J., Attreed, M., Tecle, E., Desbois, M., Kaprielian, Z. and Bülow, H. E. (2013). Skin-derived cues control arborization of sensory dendrites in *Caenorhabditis elegans*. *Cell* **155**, 308-320. doi:10.1016/j.cell.2013.08.058
- Sasakura, H., Inada, H., Kuhara, A., Fusaoka, E., Takemoto, D., Takeuchi, K. and Mori, I. (2005). Maintenance of neuronal positions in organized ganglia by SAX-7, a *Caenorhabditis elegans* homologue of L1. *EMBO J.* **24**, 1477-1488. doi:10.1038/sj.emboj.7600621
- Schouteden, C., Serwas, D., Palfy, M. and Dammermann, A. (2015). The ciliary transition zone functions in cell adhesion but is dispensable for axoneme assembly in *C. elegans*. *J. Cell Biol.* **210**, 35-44. doi:10.1083/jcb.201501013
- Smith, E. S. J., Martinez-Velazquez, L. and Ringstad, N. (2013). A chemoreceptor that detects molecular carbon dioxide. *J. Biol. Chem.* **288**, 37071-37081. doi:10.1074/jbc.M113.517367
- Špaček, J. (1985). Three-dimensional analysis of dendritic spines. III. Glial sheath. *Anat. Embryol.* **171**, 245-252. doi:10.1007/BF00341419
- Stoeckli, E. T., Sonderegger, P., Pollerberg, G. E. and Landmesser, L. T. (1997). Interference with axonin-1 and NrCAM interactions unmasks a floor-plate activity inhibitory for commissural axons. *Neuron* **18**, 209-221. doi:10.1016/S0896-6273(00)80262-7
- Takagishi, M., Sawada, M., Ohata, S., Asai, N., Enomoto, A., Takahashi, K., Weng, L., Ushida, K., Ara, H., Matsui, S. et al. (2017). Daple coordinates planar polarized microtubule dynamics in ependymal cells and contributes to hydrocephalus. *Cell Rep.* **20**, 960-972. doi:10.1016/j.celrep.2017.06.089
- Vits, L., Van Camp, G., Coucke, P., Franssen, E., De Boule, K., Reyniers, E., Korn, B., Poustka, A., Wilson, G. and Schrandt-Stumpel, C. (1994). MASA syndrome is due to mutations in the neural cell adhesion gene L1CAM. *Nat. Genet.* **7**, 408-413. doi:10.1038/ng0794-408
- Wang, Y., Kaneko, N., Asai, N., Enomoto, A., Isotani-Sakakibara, M., Kato, T., Asai, M., Murakumo, Y., Ota, H., Hikita, T. et al. (2011). Girdin is an intrinsic regulator of neuroblast chain migration in the rostral migratory stream of the postnatal brain. *J. Neurosci.* **31**, 8109-8122. doi:10.1523/JNEUROSCI.1130-11.2011
- Ward, S., Thomson, N., White, J. G. and Brenner, S. (1975). Electron microscopical reconstruction of the anterior sensory anatomy of the nematode *Caenorhabditis elegans*. *J. Comp. Neurol.* **160**, 313-337. doi:10.1002/cne.901600305
- Williams, C. L., Winkelbauer, M. E., Schafer, J. C., Michaud, E. J. and Yoder, B. K. (2008). Functional redundancy of the B9 proteins and nephrocystins in *Caenorhabditis elegans* ciliogenesis. *Mol. Biol. Cell* **19**, 2154-2168. doi:10.1091/mbc.e0710-1070
- Williams, C. L., Li, C., Kida, K., Inglis, P. N., Mohan, S., Semene, L., Bialas, N. J., Stupay, R. M., Chen, N., Blacque, O. E. et al. (2011). MKS and NPHP modules cooperate to establish basal body/transition zone membrane associations and ciliary gate function during ciliogenesis. *J. Cell Biol.* **192**, 1023-1041. doi:10.1083/jcb.201012116
- Wu, Y., Ghitani, A., Christensen, R., Santella, A., Du, Z., Rondeau, G., Bao, Z., Colón-Ramos, D. and Shroff, H. (2011). Inverted selective plane illumination microscopy (iSPIM) enables coupled cell identity lineaging and neurodevelopmental imaging in *Caenorhabditis elegans*. *Proc. Natl. Acad. Sci. USA* **108**, 17708-17713. doi:10.1073/pnas.1108494108
- Xu-Friedman, M. A., Harris, K. M. and Regehr, W. G. (2001). Three-dimensional comparison of ultrastructural characteristics at depressing and facilitating synapses onto cerebellar Purkinje cells. *J. Neurosci.* **21**, 6666-6672. doi:10.1523/JNEUROSCI.21-17-06666.2001
- Yip, Z. C. and Heiman, M. G. (2018). Ordered arrangement of dendrites within a *C. elegans* sensory nerve bundle. *eLife* **7**, e35825. doi:10.7554/eLife.35825
- Yoshimura, S., Murray, J. I., Lu, Y., Waterston, R. H. and Shaham, S. (2008). mls-2 and vab-3 Control glia development, hlh-17/Olig expression and glia-dependent neurite extension in *C. elegans*. *Development* **135**, 2263-2275. doi:10.1242/dev.019547
- Zallen, J. A., Kirch, S. A. and Bargmann, C. I. (1999). Genes required for axon pathfinding and extension in the *C. elegans* nerve ring. *Development* **126**, 3679-3692.
- Zhou, S., Opperman, K., Wang, X. and Chen, L. (2008). unc-44 Ankyrin and stn-2  $\gamma$ -syntaxin regulate sax-7 L1CAM function in maintaining neuronal positioning in *Caenorhabditis elegans*. *Genetics* **180**, 1429-1443. doi:10.1534/genetics.108.091272
- Zimmer, M., Gray, J. M., Pokala, N., Chang, A. J., Karow, D. S., Marletta, M. A., Hudson, M. L., Morton, D. B., Chronis, N. and Bargmann, C. I. (2009). Neurons detect increases and decreases in oxygen levels using distinct guanylate cyclases. *Neuron* **61**, 865-879. doi:10.1016/j.neuron.2009.02.013
